1 **An adult brain atlas reveals broad neuroanatomical changes in independently**  
2 **evolved populations of Mexican cavefish**

3

4 Cody Loomis<sup>1,2</sup>, Robert Peuß<sup>3</sup>, James Jaggard<sup>1,2</sup>, Yongfu Wang<sup>3</sup>, Sean McKinney<sup>3</sup>,  
5 Stephen Raftopoulos<sup>4</sup>, Austin Raftopoulos<sup>4</sup>, Daniel Whu<sup>4</sup>, Matthew Green<sup>2</sup>, Suzanne E.  
6 McGaugh<sup>5</sup>, Nicolas Rohner<sup>3,6</sup>, Alex C. Keene<sup>1,2</sup>, Erik R. Duboue<sup>2,4,\*</sup>

7

- 8 1. Charles E. Schmidt College of Science, Department of Biology, Florida Atlantic  
9 University, Jupiter, FL 33458
- 10 2. Jupiter Life Science Initiative, Florida Atlantic University, Jupiter, Jupiter, FL 33458
- 11 3. Stowers Institute for Medical Research, Kansas City, MO
- 12 4. Harriet L. Wilkes Honors College, Florida Atlantic University, Jupiter, FL 33458
- 13 5. Department of Ecology, University of Minnesota, St. Paul, Minnesota, USA.
- 14 6. Department of Molecular and Integrative Physiology, KU Medical Center, Kansas  
15 City, KS

16 **Abstract**

17 A shift in environmental conditions impacts the evolution of complex developmental and  
18 behavioral traits. The Mexican cavefish, *Astyanax mexicanus*, is a powerful model for  
19 examining the evolution of development, physiology, and behavior because multiple  
20 cavefish populations can be compared to an extant and ancestral-like surface population  
21 of the same species. Many behaviors have diverged in cave populations of *A. mexicanus*,  
22 and previous studies have shown that cavefish have a loss of sleep, reduced stress, an  
23 absence of social behaviors, and hyperphagia. Despite these findings, surprisingly little is  
24 known about the changes in neuroanatomy that underlie these behavioral phenotypes.  
25 Here, we use serial sectioning to generate a brain atlas of surface fish and three  
26 independent cavefish populations. Volumetric reconstruction of serial-sectioned brains  
27 confirms convergent evolution on reduced optic tectum volume in all cavefish populations  
28 tested. In addition, we quantified volumes of specific neuroanatomical loci within several  
29 brain regions, which have previously been implicated in behavioral regulation, including  
30 the hypothalamus, thalamus, and habenula. These analyses reveal an expansion of the  
31 hypothalamus across all three cavefish populations relative to surface fish, as well as  
32 subnuclei-specific differences within the thalamus and habenulae. Taken together, these  
33 analyses support the notion that changes in environmental conditions are accompanied  
34 by neuroanatomical changes in brain structures associated with behavior. This atlas  
35 provides a resource for comparative neuroanatomy of additional brain regions and the  
36 opportunity to associate brain anatomy with evolved changes in behavior.

37 **Introduction**

38 Shifts in environmental conditions drive evolutionary changes in development,  
39 morphology, and behavior (1–3). While the genetic basis of many behaviors has been  
40 studied extensively, much less is known about how changes in brain anatomy underlie  
41 behavioral evolution. Interspecies comparative approaches are often used to associate  
42 anatomical or neural circuit changes with evolved behavioral differences (4–6). However,  
43 these studies often focus on particular brain regions of interest and interpretations may be  
44 limited by the indirect nature of comparing different species. The generation of detailed  
45 anatomical brain atlases of individuals of the same species with divergent behavioral traits  
46 would provide insight into evolved changes in brain morphology that may associate with  
47 behavioral evolution.

48

49 The Mexican cavefish, *Astyanax mexicanus* provides the unique opportunity to investigate  
50 the relationship between brain anatomy and behavioral evolution in a single species (7–  
51 11). These fish exist as an eyed and pigmented population that inhabits the rivers of  
52 northeast Mexico and southern Texas, and at least 29 independent populations of largely  
53 blind and depigmented fish that inhabit the caves of northeast Mexico’s Sierra de El Abra  
54 and Sierra de Guatemala regions (Mitchell et al., 1977). Both surface and cave  
55 populations are interfertile, which allows for a direct comparisons of populations from the  
56 same species with different and well-described habitats and evolutionary history (13,14).  
57 Comparisons between surface fish and cavefish populations reveal evolved differences in  
58 diverse behavioral traits ranging from social behavior to sleep, and the emergence of  
59 these behaviors in multiple cavefish populations has established *A. mexicanus* as a model  
60 for convergent evolution (11,15–18).

61

62 A number of anatomical differences have been identified between surface fish and  
63 cavefish, including a reduction in brain regions associated with visual processing in  
64 cavefish and an expansion of the hypothalamus which is associated with social behavior  
65 (7,19,20). Nevertheless, *A. mexicanus* lacks a detailed brain atlas and little is known about  
66 the extent of anatomical changes between individual populations of cavefish. Further, an  
67 anatomical comparison between adult cave populations has not been performed, and it  
68 remains unclear if distinct or shared changes in brain anatomy underlie the behavioral  
69 differences observed between independently evolved cavefish populations.

70

71 Here, we have used serial sectioning of Nissl-stained brains, followed by volumetric  
72 reconstruction to generate a brain atlas for surface fish and three different populations of  
73 cavefish. Our analysis focuses on hypothalamic, thalamic, and habenular regions, which  
74 have previously been associated with behaviors known to diverge between surface fish  
75 and cavefish including responses to stress, social behavior, sleep regulation, feeding, and  
76 sensory processing (8,11,15–18). Our findings reveal an expansion of thalamic and  
77 habenular regions in cavefish, accompanied by a reduction in regions associated with  
78 visual processing. Strikingly, some subnuclei within the hypothalamus are expanded in  
79 cavefish, while other hypothalamic regions remain unchanged. Together, these findings  
80 provided a detailed anatomical reference for *A. mexicanus* and provide insight into the  
81 anatomical plasticity that accompanies the evolution of multiple behaviors.

82

## 83 **Results**

### 84 *Volumetric reconstruction of serial sectioned adult brains*

85 To generate an adult brain atlas, we serially sectioned brains of adult *A. mexicanus* from  
86 surface fish and three independent populations of cavefish: Pachón, Molino and Tinaja  
87 (Figure 1A). The Pachón and Tinaja populations are ‘old lineage’ and are closely related,  
88 while fish from the Molino population represent a ‘new lineage.’ All cave populations are  
89 thought to be independently derived origins of the cave phenotype (21–23). Surface fish  
90 used in this experiment are derived from a lineage that is more closely related to the Molino  
91 cave fish population than to Tinaja and Pachón (23). Brains were dissected from adult  
92 animals, serial sectioned at 8  $\mu\text{m}$  thickness, stained with cresyl violet dye (Nissl), and  
93 imaged, resulting in 424-760 sections per brain. We then registered all brain slices such  
94 that they aligned with one another, and imported the data into AMIRA 3D rendering  
95 software, where serial-sections were volumetrically reconstructed to generate a 3-  
96 dimensional brain (Figure 1B, Supplemental Movie 1-4).

97

98 Specific neuroanatomical regions in each brain were identified by comparing an adult  
99 zebrafish brain atlas (24), and a previously annotated brain of the cavefish from the Micos  
100 cave (25), a hybrid cave population (population with cave and surface-like animals) of the  
101 new lineage (22). After locating individual neuroanatomical regions, we defined each brain  
102 nucleus by demarcating the boundaries of the region throughout serial sections using  
103 AMIRA. We then quantified a volume of each region (Figure 1B). The volume of each  
104 quantified region was normalized to the total brain volume, measured from the anterior

105 telencephalon to the posterior cerebellum providing a measurement of relative volumetric  
106 enlargement or reduction in size between *A. mexicanus* populations.

107

#### 108 *Regression of optic tectum volume in cavefish populations*

109 As proof of principle, we first quantified the optic tectum cell body (Figure 2A-C, red) and  
110 neuropil (Figure 2A-C, blue) layers, which have been reported as reduced in Pachón  
111 cavefish (20,26). The optic tectum in adult teleosts is a laminated structure with a dense  
112 region termed the optic neuropil lying ventral to the tectum. In agreement with previous  
113 findings, whole-brain reconstructions revealed a nearly two-fold reduction in tectum size  
114 in Pachón cavefish populations, as well as Molino and Tinaja populations, compared to  
115 surface fish (Figure 2A-C). To increase statistical power, we combined the total optic  
116 tectum volume of all cave populations and compared to surface fish. This comparison  
117 revealed significant differences in volume between surface and cave morphs (Figure 2D).  
118 Quantification of total volumes between surface and the three cave populations revealed  
119 a substantial reduction in total volume (Pachón = 68.69% decrease in volume compared  
120 to surface fish, Tinaja = 67.68% decrease in volume compared to surface fish, Molino =  
121 50.51% decrease in volume compared to surface fish). In addition to the cell body layer of  
122 the tectum, the volume of the optic neuropil appeared qualitatively reduced across all three  
123 cave populations as well (Figure 2C), and quantification of volumes showed that the  
124 neuropil was smaller in cavefish relative to surface animals (Pachón = 43.24% decrease  
125 in volume compared to surface fish, Tinaja = 35.14% decrease in volume compared to  
126 surface fish, Molino = 24.32% decrease in volume compared to surface fish). When all  
127 three cavefish populations are clustered together, the optic neuropil size was reduced  
128 significantly compared to surface fish (Figure 2E). These findings extend previous  
129 observations in Pachón cavefish to Molino and Tinaja (20), revealing convergence on  
130 reduced size of the optic tectum in adult cavefish populations.

131

#### 132 *Expansion of the telencephalic nuclei in cavefish populations*

133 The telencephalon modulates diverse behaviors that differ between surface and cavefish,  
134 including sleep, stress, and aggression (11,27–30). We therefore quantified telencephalon  
135 volume across *A. mexicanus* populations and found it to be expanded in all three  
136 populations of cavefish compared to surface fish (Figure 3A-C). Comparing total volume  
137 for surface fish and the combined data for cavefish populations revealed a significant  
138 increase in volume in cavefish (Figure 3D; Pachón = 52.11% increase in volume compared

139 to surface fish, Tinaja = 57.04% increase in volume compared to surface fish, Molino =  
140 57.75% increase in volume compared to surface fish). Despite these cave populations  
141 representing independent origins of the cave morph, no qualitative differences were  
142 observed between cavefish populations, suggesting that evolution repeatedly shapes  
143 brain morphology in similar ways. In addition, we observed differences in telencephalon  
144 shape between surface and cavefish populations. In all three cavefish populations the  
145 telencephalon is longer along the anterior-posterior axis than in surface fish (Figure 3A).  
146 Collectively, these data reveal a robust expansion of the telencephalon across three  
147 independent cavefish populations.

148

#### 149 *Analysis of thalamic and habenula nuclei*

150 The thalamus is a central relay unit connecting the forebrain with downstream mid- and  
151 hindbrain targets, and different regions of the thalamus have been shown in mammals to  
152 modulate diverse behaviors including stress, aggression, and sleep (31–36). Moreover,  
153 anatomy and function of thalamic nuclei are conserved among mammals and fish (37–  
154 40). Quantification of the entire thalamus revealed no significant differences in gross  
155 volume cave and surface fish (Figure 4A-D; Pachón = 3.57% increase in volume  
156 compared to surface fish, Tinaja = 25.0% increase in volume compared to surface fish,  
157 Molino = 53.0% increase in volume compared to surface fish). We then examined  
158 volumetric differences between thalamic subnuclei, including the posterior, anterior,  
159 ventrolateral, ventromedial, intermediate, and central posterior (Figure S1). Of these, the  
160 posterior thalamic nuclei were significantly larger in the cavefish populations (Figure S1A).  
161 The anterior, ventrolateral and ventromedial thalamic subnuclei were, on average, larger  
162 in cavefish populations, with volumetric differences approaching significance (Figure S1B-  
163 C). By contrast, no differences were observed for the intermediate and central posterior  
164 nuclei (Figure S1D-E).

165

166 The habenular nuclei are a conserved brain nucleus that also connect forebrain to  
167 midbrain (41,42). In rodents and other mammals, the habenulae have been shown to  
168 regulate diverse behaviors, including sleep, stress, feeding, and social interactions (43–  
169 47). Recently, the habenular nuclei have also been found to modulate similar behaviors in  
170 zebrafish (38,40,48). Because many of the behaviors modulated by the habenulae differ  
171 between surface and cave morphs, we examined volumes of the subnuclei of the  
172 habenulae. The habenula is comprised of the dorsal and ventral habenula, and its

173 commissure (49), and this neuroanatomy is conserved among vertebrates (50). The entire  
174 habenulae was enlarged in most cavefish populations, though this did not reach statistical  
175 significance (Figure 4A-C, E; Pachón= 0.0% increase in volume compared to surface fish,  
176 Tinaja = 66.0% increase in volume compared to surface fish, Molino = 125.0% increase  
177 in volume compared to surface fish). Examining individual subnuclei revealed an  
178 expansion of dorsal habenular nucleus (Had) and ventral habenular nucleus (Hav) (Figure  
179 S2A,B) across all three cavefish populations. The habenular commissure (Chab) also  
180 appeared enlarged cave populations although there was a high-level of inter-animal  
181 variability (Figure S2C). Taken together, these findings reveal subnuclei-specific  
182 differences within the habenula of cavefish.

183

184 *Analysis of the hypothalamus reveal evolutionary changes to some but not all subnuclei*

185 The hypothalamus controls numerous homeostatically regulated behaviors that are known  
186 to differ between surface fish and cavefish, including sleep, feeding, stress, and social  
187 behaviors (10,15–18,51). To determine whether these behavioral changes are  
188 accompanied by alterations in anatomy, we quantified the overall size of the  
189 hypothalamus, as well as individual subnuclei that modulate distinct behaviors in  
190 mammals (Figure 5 and Figure S3). We found the total volume of the hypothalamus was  
191 enlarged across all three cavefish populations compared to surface fish (Figure 4A-D,  
192 Supplemental Movie 5-8; Pachón = 41.78% increase in volume compared to surface fish,  
193 Tinaja = 36.44% increase in volume compared to surface fish, Molino = 48.0% increase  
194 in volume compared to surface fish). An expanded hypothalamus in cavefish has been  
195 demonstrated previously for larval forms (19), and thus these data reveal that  
196 hypothalamic expansion is conserved through adulthood.

197

198 We next examined the volume of different hypothalamic subnuclei (Figure S3). We first  
199 measured the suprachiasmatic nucleus (SCN). The SCN is a critical regulator of circadian  
200 rhythms in mammals (52,53). SCN size was reduced in Pachón cavefish relative to  
201 surface fish (though interpretations are limited by the small sample size) but did not differ  
202 between surface fish and Molino or Tinaja cavefish, suggesting cave-population specific  
203 differences in SCN anatomy (Figure S3A). Conversely, the size of the following three  
204 hypothalamic subnuclei were enlarged: lateral hypothalamus (Hl), dorsal hypothalamus  
205 (Hd) and caudal hypothalamus (Hc) across cavefish populations compared to their surface  
206 conspecifics (Figure S3B-D). When all cavefish individuals are combined, these nuclei are

207 significantly enlarged in cavefish. Furthermore, ventral hypothalamus (Hv,  $p = 0.077$ ),  
208 paraventricular hypothalamus (PVO,  $p = 0.071$ ), and the preoptic nucleus (PON,  $p =$   
209  $0.074$ ) were larger in cavefish relative to surface fish, with volumetric differences between  
210 surface and cave animals approaching significance (Figure S3E-G). These findings reveal  
211 that differences in specific subnuclei, and not overall enlargement of the hypothalamus is  
212 responsible for the observed difference in size between surface fish and cavefish.

213

## 214 **Discussion**

215 Here we present an adult brain atlas for surface *A. mexicanus* and three populations of  
216 cavefish. A highly detailed brain atlas has been previously generated in zebrafish (24),  
217 and another brain atlas has been published in a cave/surface hybrid population of *A.*  
218 *mexicanus* cavefish (though it is untranslated from German) (25). These two resources  
219 provide a point of comparison for identifying neuroanatomical loci in cave and surface  
220 populations of *A. mexicanus*. An estimated ~100-250 million years ago of divergence  
221 separate *A. mexicanus* and *Danio rerio* (54,55). We found the brains of *A. mexicanus*  
222 were largely homologous to zebrafish, allowing for identification major brain structures.

223

224 Our analysis provides the first comparative brain atlas for surface and cave populations of  
225 *A. mexicanus*. The use of automated serial sectioning allows for volumetric reconstruction  
226 of brain regions and semi-quantitative comparisons of neuroanatomy between surface  
227 and cavefish populations. While this approach is technically feasible, practically it is limited  
228 due to the labor-intensive nature of manually tracing brain regions, and difficulties  
229 obtaining complete sectioned brains. In this study, we chose to focus on the visual system  
230 as a proof-of-principle, as well as the hypothalamus, thalamus, and habenula due to their  
231 known role in behavioral regulation. While the small number of replicates largely prevented  
232 statistical comparisons between individual cavefish populations, the robust volume  
233 differences observed between surface and cave populations for many brain regions  
234 suggest this approach may be practical for detailed anatomical comparison. Here, we  
235 have made all raw data available so that others may quantify additional brain regions of  
236 interest.

237

238 Brain atlases have been widely used in a number of species, including zebrafish, and have  
239 expanded greatly our understanding of how individual neuronal areas modulate myriad  
240 behaviors (24,56–61). Brain atlases have been generated in larval zebrafish that provide



241 near single-neuron resolution of brain structures (56,57,62,63). The transparency of the  
242 zebrafish larvae allows for the application of functional imaging approaches (64,65), that  
243 can then be mapped on brain atlases to identify changes in activity within defined neurons  
244 (62). *A. mexicanus* larvae, like zebrafish, are transparent, providing potential for the  
245 generation of a high-resolution brain atlas.

246

247 While this level of accuracy is not possible in adult fish, due to the larger size of the brain  
248 and the need for sectioning, the added complexity of the adult brain and its considerable  
249 homology to the mammalian brain is particularly effective in comparative neuroanatomy.  
250 Further, a number of behaviors that differ between surface and cave individuals are not  
251 present in larval forms. For example, a loss of aggressive behavior has been documented  
252 in cavefish animals (11), and other studies have demonstrated that cavefish do not school,  
253 whereas their surface conspecifics do (16). Many of these behaviors are not present in  
254 larval forms, and thus an adult atlas facilitates identification of brain regions that modulate  
255 more complex behaviors only seen in adults.

256

257 In this study, brain regions were standardized to the overall size of the brain from the  
258 anterior telencephalon to the posterior cerebellum since these areas were the most  
259 consistent between samples. To correct for individual differences in size and growth rate,  
260 we normalized all brain volumes (66). Quantitative comparisons between smaller  
261 neuroanatomical regions, such as subnuclei within the hypothalamus or thalamus, may  
262 be confounded by large differences within other brain regions, such as the optic tectum.  
263 However, the variability in differences between subnuclei suggests localized changes in  
264 brain volume can be detected. As an example, most nuclei in the hypothalamus are  
265 expanded across cavefish populations, yet no differences are detected within the SCN for  
266 Tinaja and Molino caves relative to surface.

267

268 Our findings identify the expansion of multiple hypothalamic nuclei, suggesting shared  
269 processes may govern evolved differences in hypothalamic development. The  
270 hypothalamus in cavefish larvae is expanded through a mechanism that is dependent on  
271 the differential expression of several morphogens and transcription factors, including sonic  
272 hedgehog and Nkx2.1 (19). One hypothesis is that reduced anatomical constraints from  
273 eye-loss allow for hypothalamic expansion. A number of hypothalamic neuropeptides are  
274 known to be upregulated in cavefish including HCRT and NPY, which localize to the lateral

275 hypothalamus and periventricular/lateral hypothalamus respectively (7,8,67). Both of  
276 these nuclei are larger across all three populations of cavefish. Many hypothalamus-  
277 regulated behaviors including sleep, feeding, aggression, and sociality are altered in  
278 cavefish (8,10,11,15–17,68), suggesting hypothalamic function may be a under significant  
279 selective pressure.

280 In agreement with the previous literature, we identify convergent evolution of changes in  
281 brain regions associated with sensory processing (20,26,69). The optic tectum is  
282 significantly reduced across all three cavefish populations. These findings are consistent  
283 with an increased reliance on non-visual cues in cave animals (9,70). Future work will  
284 explore how the reliance on nonvisual cues has shaped brain regions. For example, taste  
285 buds are more numerous in cavefish (69,71) and the lateral line of cavefish is also  
286 significantly expanded, suggesting increased reliance on sensory processes that do not  
287 involve sight (72,73). The sensory neurons from taste and mechanosensation neurons  
288 project to the nucleus of the solitary tract (NST) and medial octavolateralis nucleus (MON)  
289 within the brain, respectively (74–76). Based on findings from other sensory pathways,  
290 these regions may be predicted to be enlarged. Future analysis of serially sectioned brains  
291 will allow for detailed quantification and comparison of sensory structures between *A.*  
292 *mexicanus* populations.

293 Here, we used brains stained with Nissl, and demarcated manually individual regions of  
294 the adult brain. We see two main future expansions of this work. First, future efforts will  
295 streamline the labor-intensive approach of manual demarcation of individual regions.  
296 Similar large-scale neuroanatomical reconstruction efforts, such as electron microscopy  
297 tracing of the *Drosophila* brain have been successful in analyzing large data sets like these  
298 (77). It is also possible that automated tracing methodology may be developed to reduce  
299 the time required for analysis. Further, future imaging of additional serially-section brains  
300 may allow for more quantitative comparisons between populations. Second, in zebrafish  
301 and other models, transgenic labeling of precise neuronal population has facilitated greatly  
302 the demarcation of individual neuronal regions (78,79). Moreover, transgenic labeling of  
303 neurons in the brain permits tracing of neuronal projection, something that is not possible  
304 with Nissl staining (68,80). Whereas transgenic technology has not been widely used in  
305 *A. mexicanus*, recent studies have shown that the Tol2 system, which is widely used in  
306 zebrafish, is highly effective in *A. mexicanus* surface and cavefish (81–83). Future work

307 incorporating these tools would facilitate a highly defined neuroanatomical brain atlas for  
308 the *A. mexicanus* adult brain.

309

## 310 **Methods**

### 311 Fish husbandry

312 Animals care and husbandry were carried out as previously described (8,84). Briefly, adult  
313 *A. mexicanus* stocks were originally obtained from the Jeffery (University of Maryland) or  
314 Borowsky (New York University). These fish have been bred and maintained on a  
315 recirculating aquatics system at Florida Atlantic University. The water temperature was  
316 maintained at  $21 \pm 1^\circ\text{C}$ , and the lights were maintained on a 14:10 LD cycle (25-40 lux at  
317 lights on). All fish were fed a mix of fish flakes (TetraMin) and California black worms  
318 (Aquatic Foods). All experiments in this study were approved by the Institutional Animal  
319 Care and Usage Committee (IACUC) at Florida Atlantic University, protocol numbers A17–  
320 21 and A15–32, or the IACUC at Stowers Institute for Medical Research. All fish used in  
321 this study were approximately 1 year old. A total of 10 brains were dissected and analyzed  
322 per population. We used 2 male and 1 female brains from surface population, 1 male and  
323 1 female brains from Pachón population, 1 male and 2 female brains from Tinaja  
324 population, and 1 male and 1 female brains from Molino population. In some cases, brains  
325 could not be quantified for all neuroanatomical regions due to tissue damage.

326

327

### 328 Sectioning

329 Fish were euthanized by incubation in MS-222 (500 mg/mL) for 10 min and decapitated  
330 using sharp scissors. The head was immediately fixed with freshly prepared 4 %  
331 paraformaldehyde (PFA, diluted from 16% (wt/vol) aqueous solution, Electron Microscopy  
332 Sciences, cat# 15710) in 1 x PBS for 48 hours at  $4^\circ\text{C}$  with a change of 4 % PFA / 1xPBS  
333 after 3 hours. Heads were washed three times in 1xPBS and subsequently, brains were  
334 dissected according to Moran et al. (26). Brains were dehydrated through graded ethanol  
335 (30%, 50%, 70%) and processed with a PATHOS Delta hybrid tissue processor (Milestone  
336 Medical Technologies, Inc, MI) followed by paraffin embedding. Coronal slices of paraffin  
337 sections with 8  $\mu\text{m}$  thickness were continuously cut using a Leica RM2255 microtome  
338 (Leica Biosystems Inc. Buffalo Grove, IL) and mounted on Superfrost Plus microscope  
339 slides (cat# 12-550-15, Thermo Fisher Scientific). Nissl staining was performed as  
340 described in Vacca et al. (85). Briefly, sections were deparaffinized and hydrated to

341 distilled water. Sections were stained in cresyl echt violet (0.5 g cresyl echt violet (CI  
342 51010); 80 mL distilled water; 20 mL absolute alcohol) for 8 minutes, briefly rinsed in  
343 distilled water, dehydrated with 95 % absolute alcohol 2 times, subsequently cleared in 2  
344 changes of xylene and finally mounted. Slides were scanned using an Olympus slide  
345 scanner VS120 with a 20x objective. Images were extracted from VSI files in sequence  
346 using a customized plugin in Fiji (ver 1.51H)(86), a mask constructed, and registered using  
347 a multithreaded version of StackReg1 (87). Blank spaces in the registered image were  
348 filled with artificial noise that matched the all-white background using a custom plugin in  
349 Fiji. Plugins are available at <https://github.com/jouyun/smc-plugins> and  
350 <https://github.com/cwood1967/IJPlugins/>

351

### 352 Volumetric Reconstruction

353 ImageJ FIJI (ver 1.51H)(86) was used to convert serial sections to a .tif image sequence.  
354 Image sequence was uploaded into the AMIRA software (ver 6.2.0, Thermo Fisher,  
355 Waltham, MA). To create proper demarcations, neuroanatomical regions of interest (ROIs)  
356 from Nissl stains were set under the “segmentation” tab using the lasso tool. To view 3-  
357 dimensional reconstructions of neuroanatomical ROI’s, a ‘volren’ object was created under  
358 the “project” tab. Volren object was connected to the original .tif image sequence as well  
359 as the label fields used to create demarcated neuroanatomical ROI’s.

360

### 361 Measurements and Statistical analysis:

362 To quantify total volume of individual demarcated regions (i.e., each ROI), we used the  
363 ‘volume per VOI’ result of the ‘material statistics’ function in AMIRA (ver 6.2.0). To correct  
364 for differences in size and growth rate among different fish populations, all volumetric  
365 results were normalized to the length of the brain from the anterior telencephalon to the  
366 posterior cerebellum; volumetric measurements were thus calculated as a percentage of  
367 volume relative to this normalized length. For statistical comparisons of ROI volumes  
368 between two groups (i.e. the pooled cavefish data compared to surface), we used a  
369 standard two-tailed t-test. For statistical comparisons of more than 2-groups, a parametric  
370 ANOVA was implemented. All statistics were performed using GraphPad Prism (ver 7.0).

371 Acknowledgements

372 The authors would like to acknowledge Nancy Thomas and the histology core at the  
373 Stowers Institute for support on the brain sectioning. Furthermore, we would like to thank  
374 the aquatics team at the Stowers Institute for husbandry of the fish. This work was  
375 supported by grants R15MH118625 to E.R.D., R21NS105071 to E.R.D and A.C.K.,  
376 R01GM127872, NSF IOS165674, BSF2018-190 to A.C.K, and by institutional funding to  
377 NR. NR was supported by the Edward Mallinckrodt Foundation and JDRF. RP was  
378 supported by a grant from the Deutsche Forschungsgemeinschaft (PE 2807/1-1).

379

380

381 Data availability statement

382 Original data underlying this manuscript can be accessed from the Stowers Original  
383 Data Repository at <http://www.stowers.org/research/publications/libpb-1427>. All original  
384 and analyzed data will also be provided upon request.

385

386

387 **References**

- 388 1. Shapiro MD, Marks ME, Peichel CL, Blackman BK, Nereng KS, Jónsson B,  
389 Schluter D, Kingsley DM. Genetic and developmental basis of evolutionary pelvic  
390 reduction in threespine sticklebacks. *Nature* (2004) doi:10.1038/nature02415
- 391 2. Peichel CL, Nereng KS, Ohgi KA, Cole BLE, Colosimo PF, Buerklet CA, Schluter  
392 D, Kingsley DM. The genetic architecture of divergence between threespine  
393 stickleback species. *Nature* (2001) doi:10.1038/414901a
- 394 3. Jeffery WR. Chapter 8 Evolution and Development in the Cavefish *Astyanax*. *Curr*  
395 *Top Dev Biol* (2009) **86**:191–221. doi:10.1016/S0070-2153(09)01008-4
- 396 4. Jarvis ED. Learned birdsong and the neurobiology of human language. in *Annals*  
397 *of the New York Academy of Sciences* doi:10.1196/annals.1298.038
- 398 5. Schenker NM, Buxhoeveden DP, Blackmon WL, Amunts K, Zilles K, Semendeferi  
399 K. A comparative quantitative analysis of cytoarchitecture and minicolumnar  
400 organization in Broca's area in humans and great apes. *J Comp Neurol* (2008)  
401 doi:10.1002/cne.21792

- 402 6. Shapiro LE, Leonard CM, Sessions CE, Dewsbury DA, Insel TR. Comparative  
403 neuroanatomy of the sexually dimorphic hypothalamus in monogamous and  
404 polygamous voles. *Brain Res* (1991) doi:10.1016/0006-8993(91)91023-T
- 405 7. Alié A, Devos L, Torres-Paz J, Prunier L, Boulet F, Blin M, Elipot Y, Rétaux S.  
406 Developmental evolution of the forebrain in cavefish, from natural variations in  
407 neuropeptides to behavior. *Elife* (2018) doi:10.7554/eLife.32808
- 408 8. Jaggard JB, Stahl BA, Lloyd E, Prober DA, Duboue ER, Keene AC. Hypocretin  
409 underlies the evolution of sleep loss in the Mexican cavefish. *Elife* (2018) 7:  
410 doi:10.7554/eLife.32637
- 411 9. Yoshizawa M, Gorički Š, Soares D, Jeffery WR. Evolution of a behavioral shift  
412 mediated by superficial neuromasts helps cavefish find food in darkness. *Curr Biol*  
413 (2010) **20**:1631–1636. doi:10.1016/j.cub.2010.07.017
- 414 10. Lloyd E, Olive C, Stahl BA, Jaggard JB, Amaral P, Duboué ER, Keene AC.  
415 Evolutionary shift towards lateral line dependent prey capture behavior in the blind  
416 Mexican cavefish. *Dev Biol* (2018) doi:10.1016/j.ydbio.2018.04.027
- 417 11. Elipot Y, Hinaux H, Callebert J, Rétaux S. Evolutionary shift from fighting to  
418 foraging in blind cavefish through changes in the serotonin network. *Curr Biol*  
419 (2013) **23**:1–10. doi:10.1016/j.cub.2012.10.044
- 420 12. Mitchell RW, Russell WH, Elliott WR. *Mexican Eyeless Characin Fishes, Genus*  
421 *Astyanax: Environment, Distribution, and Evolution*. (1977).
- 422 13. Şadoğlu P. A mendelian gene for albinism in natural cave fish. *Experientia* (1957)  
423 **13**:394–394.
- 424 14. Wilkens H. Genetic Interpretation of Regressive Evolutionary Processes: Studies  
425 on Hybrid Eyes of Two *Astyanax* Cave Populations (Characidae, Pisces).  
426 *Evolution (N Y)* (1971) doi:10.2307/2407352
- 427 15. Duboué ERER, Keene ACAC, Borowsky RLRL. Evolutionary convergence on  
428 sleep loss in cavefish populations. *Curr Biol* (2011) **21**:671–676.  
429 doi:10.1016/j.cub.2011.03.020
- 430 16. Kowalko JE, Rohner N, Rompani SB, Peterson BK, Linden TA, Yoshizawa M, Kay

- 431 EH, Weber J, Hoekstra HE, Jeffery WR, et al. Loss of schooling behavior in  
432 cavefish through sight-dependent and sight-independent mechanisms. *Curr Biol*  
433 (2013) **23**:1874–1883. doi:10.1016/j.cub.2013.07.056
- 434 17. Kowalko J, Rohner N, Linden T, Rompani S, Warren W, Borowsky R, Tabin C,  
435 Jeffery W, Yoshizawa M. Convergence in feeding posture occurs through different  
436 genetic loci in independently evolved cave populations of *Astyanax mexicanus*.  
437 *Proc Natl Acad Sci* (2013) **110**:16933–16938. doi:10.1073/pnas.1317192110
- 438 18. Chin JS, Gassant CE, Amaral PM, Lloyd E, Stahl BA, Jaggard JB, Keene AC,  
439 Duboue ER. Convergence on reduced stress behavior in the Mexican blind  
440 cavefish. *Dev Biol* (2018)
- 441 19. Menuet A, Alunni A, Joly J-SJ-S, Jeffery WR, Retaux S, Rétaux S. Expanded  
442 expression of Sonic Hedgehog in *Astyanax* cavefish: multiple consequences on  
443 forebrain development and evolution. *Development* (2007) **134**:845–855.  
444 doi:10.1242/dev.02780
- 445 20. Soares D, Yamamoto Y, Strickler AG, Jeffery WR. The lens has a specific  
446 influence on optic nerve and tectum development in the blind cavefish *Astyanax*.  
447 *Dev Neurosci* (2004) doi:10.1159/000082272
- 448 21. Ornelas-García CP, Domínguez-Domínguez O, Doadrio I. Evolutionary history of  
449 the fish genus *astyanax* baird & Girard (1854) (Actinopterygii, Characidae) in  
450 mesoamerica reveals multiple morphological homoplasies. *BMC Evol Biol* (2008)  
451 **8**: doi:10.1186/1471-2148-8-340
- 452 22. Bradic M, Teotónio H, Borowsky RL. The population genomics of repeated  
453 evolution in the blind cavefish *astyanax mexicanus*. *Mol Biol Evol* (2013) **30**:2383–  
454 2400. doi:10.1093/molbev/mst136
- 455 23. Herman A, Brandvain Y, Weagley J, Jeffery WR, Keene AC, Kono TJY, Bilandžija  
456 H, Borowsky R, Espinasa L, O’Quin K, et al. The role of gene flow in rapid and  
457 repeated evolution of cave-related traits in Mexican tetra, *Astyanax mexicanus*.  
458 *Mol Ecol* (2018) doi:10.1111/mec.14877
- 459 24. Wulliman MF, Rupp B, Reichert H. *Neuroanatomy of the Zebrafish Brain*. Basel,  
460 Switzerland: Birkhäuser Verlag (1996).

- 461 25. Natke C. *Vergleichende Untersuchungen am optischen System von Fluss- und*  
462 *Hohlenform des Silbersalmlers *Astyanax mexicanus* (Characidae, Teleostei):*  
463 *Faserdarstellung mit Hilfe fluoreszierender Carbocyanine.* (1999).
- 464 26. Moran D, Softley R, Warrant EJ. The energetic cost of vision and the evolution of  
465 eyeless Mexican cavefish. *Sci Adv* (2015) doi:10.1126/sciadv.1500363
- 466 27. Portavella M, Torres B, Salas C. Avoidance Response in Goldfish: Emotional and  
467 Temporal Involvement of Medial and Lateral Telencephalic Pallium. *J Neurosci*  
468 (2004) **24**:2335–2342. doi:10.1523/JNEUROSCI.4930-03.2004
- 469 28. Portavella M, Torres B, Salas C, Papini MR. Lesions of the medial pallium, but not  
470 of the lateral pallium, disrupt spaced-trial avoidance learning in goldfish  
471 (*Carassius auratus*). *Neurosci Lett* (2004) **362**:75–78.  
472 doi:10.1016/j.neulet.2004.01.083
- 473 29. Lal P, Tanabe H, Suster ML, Ailani D, Kotani Y, Muto A, Itoh M, Iwasaki M, Wada  
474 H, Yaksi E, et al. Identification of a neuronal population in the telencephalon  
475 essential for fear conditioning in zebrafish. *BMC Biol* (2018) doi:10.1186/s12915-  
476 018-0502-y
- 477 30. Kaslin J, Nystedt JM, Stergård MÖ, Peitsaro N, Panula P. The Orexin/Hypocretin  
478 System in Zebrafish Is Connected to the Aminergic and Cholinergic Systems. *J*  
479 *Neurosci* (2004) **24**:2678 –2689.
- 480 31. Chauveau F, Piérard C, Corio M, Célérier A, Christophe T, Vouimba RM, Guillou  
481 JL, Béracochéa D. Mediodorsal thalamic lesions block the stress-induced  
482 inversion of serial memory retrieval pattern in mice. *Behav Brain Res* (2009)  
483 doi:10.1016/j.bbr.2009.05.014
- 484 32. Fernandez LM, Vantomme G, Osorio-Forero A, Cardis R, Béard E, Lüthi A.  
485 Thalamic reticular control of local sleep in mouse sensory cortex. *Elife* (2018)  
486 doi:10.7554/elife.39111
- 487 33. Kim A, Latchoumane C, Lee S, Kim GB, Cheong E, Augustine GJ, Shin H-S.  
488 Optogenetically induced sleep spindle rhythms alter sleep architectures in mice.  
489 *Proc Natl Acad Sci* (2012) doi:10.1073/pnas.1217897109



- 490 34. Latchoumane CF V., Ngo HV V., Born J, Shin HS. Thalamic Spindles Promote  
491 Memory Formation during Sleep through Triple Phase-Locking of Cortical,  
492 Thalamic, and Hippocampal Rhythms. *Neuron* (2017)  
493 doi:10.1016/j.neuron.2017.06.025
- 494 35. Shin LM, Liberzon I. The neurocircuitry of fear, stress, and anxiety disorders.  
495 *Neuropsychopharmacology* (2010) doi:10.1038/npp.2009.83
- 496 36. Li Y, Dong X, Li S, Kirouac GJ. Lesions of the posterior paraventricular nucleus of  
497 the thalamus attenuate fear expression. *Front Behav Neurosci* (2014)  
498 doi:10.3389/fnbeh.2014.00094
- 499 37. Mueller T, Wullimann MF. An evolutionary interpretation of teleostean forebrain  
500 anatomy. in *Brain, Behavior and Evolution*, 30–42. doi:10.1159/000229011
- 501 38. Duboué ERER, Hong E, Eldred KCKC, Halpern MEME. Left Habenular Activity  
502 Attenuates Fear Responses in Larval Zebrafish. *Curr Biol* (2017) **27**:2154-  
503 2162.e3. doi:10.1016/j.cub.2017.06.017
- 504 39. Amo R, Aizawa H, Takahoko M, Kobayashi M, Takahashi R, Aoki T, Okamoto H.  
505 Identification of the Zebrafish Ventral Habenula As a Homolog of the Mammalian  
506 Lateral Habenula. *J Neurosci* (2010) **30**:1566–1574.  
507 doi:10.1523/JNEUROSCI.3690-09.2010
- 508 40. Chou M-Y, Amo R, Kinoshita M, Cherng B-W, Shimazaki H, Agetsuma M, Shiraki  
509 T, Aoki T, Takahoko M, Yamazaki M, et al. Social conflict resolution regulated by  
510 two dorsal habenular subregions in zebrafish. *Science (80- )* (2016) **352**:87–90.  
511 doi:10.1126/science.aac9508
- 512 41. Sutherland RJ. The dorsal diencephalic conduction system: A review of the  
513 anatomy and functions of the habenular complex. *Neurosci Biobehav Rev* (1982)  
514 **6**:1–13. doi:10.1016/0149-7634(82)90003-3
- 515 42. Viswanath H, Carter AQ, Baldwin PR, Molfese DL, Salas R. The medial habenula:  
516 still neglected. *Front Hum Neurosci* (2014) **7**: doi:10.3389/fnhum.2013.00931
- 517 43. Murphy CA, DiCamillo AM, Haun F, Murray M. Lesion of the habenular efferent  
518 pathway produces anxiety and locomotor hyperactivity in rats: A comparison of

- 519 the effects of neonatal and adult lesions. *Behav Brain Res* (1996) **81**:43–52.  
520 doi:10.1016/S0166-4328(96)00041-1
- 521 44. Murray M, Murphy CA, Ross LL, Haun F. The role of the habenula-  
522 interpeduncular pathway in modulating levels of circulating adrenal hormones.  
523 *Restor Neurol Neurosci* (1994) **6**:301–307. doi:10.3233/RNN-1994-6406
- 524 45. Haun F, Eckenrode T, Murray M. Habenula and thalamus cell transplants restore  
525 normal sleep behaviors disrupted by denervation of the interpeduncular nucleus. *J*  
526 *Neurosci* (2018) doi:10.1523/jneurosci.12-08-03282.1992
- 527 46. van Kerkhof LWM, Damsteegt R, Trezza V, Voorn P, Vanderschuren LJMJ.  
528 Functional integrity of the habenula is necessary for social play behaviour in rats.  
529 *Eur J Neurosci* (2013) doi:10.1111/ejn.12353
- 530 47. Stamatakis AM, Van Swieten M, Basiri ML, Blair GA, Kantak P, Stuber GD.  
531 Lateral Hypothalamic Area Glutamatergic Neurons and Their Projections to the  
532 Lateral Habenula Regulate Feeding and Reward. *J Neurosci* (2016)  
533 doi:10.1523/jneurosci.1202-15.2016
- 534 48. Agetsuma M, Aizawa H, Aoki T, Nakayama R, Takahoko M, Goto M, Sassa T,  
535 Amo R, Shiraki T, Kawakami K, et al. The habenula is crucial for experience-  
536 dependent modification of fear responses in zebrafish. *Nat Neurosci* (2010)  
537 **13**:1354–1356. doi:10.1038/nn.2654
- 538 49. Duboué ER, Halpern MEME, Duboué ER, Halpern MEME. “Genetic and  
539 transgenic approaches to study zebrafish brain asymmetry and lateralized  
540 behavior,” in *Neuromethods*, 553–589. doi:10.1007/978-1-4939-6725-4\_17
- 541 50. deCarvalho TN, Subedi A, Rock J, Harfe BD, Thisse C, Thisse B, Halpern ME,  
542 Hong E. Neurotransmitter map of the asymmetric dorsal habenular nuclei of  
543 Zebrafish. *Genesis* (2014) **52**:636–655. doi:10.1002/dvg.22785
- 544 51. Zha X, Xu X. Dissecting the hypothalamic pathways that underlie innate  
545 behaviors. *Neurosci Bull* (2015) doi:10.1007/s12264-015-1564-2
- 546 52. Moore HA, Whitmore D. Circadian rhythmicity and light sensitivity of the zebrafish  
547 brain. *PLoS One* (2014) doi:10.1371/journal.pone.0086176

- 548 53. Moore R. The suprachiasmatic nucleus and the organization of a circadian  
549 system. *Trends Neurosci* (1982) **5**:404–407.
- 550 54. Nakatani M, Miya M, Mabuchi K, Saitoh K, Nishida M. Evolutionary history of  
551 Otophysi (Teleostei), a major clade of the modern freshwater fishes: Pangaeon  
552 origin and Mesozoic radiation. *BMC Evol Biol* (2011) doi:10.1186/1471-2148-11-  
553 177
- 554 55. Peng Z, He S, Wang J, Wang W, Diogo R. Mitochondrial molecular clocks and the  
555 origin of the major Otocephalan clades (Pisces: Teleostei): A new insight. *Gene*  
556 (2006) **370**:113–24.
- 557 56. Randlett O, Wee CL, Naumann EA, Nnaemeka O, Schoppik D, Fitzgerald JE,  
558 Portugues R, Lacoste AMB, Riegler C, Engert F, et al. Whole-brain activity  
559 mapping onto a zebrafish brain atlas. *Nat Methods* (2015) **12**:1039–1046.  
560 doi:10.1038/nmeth.3581
- 561 57. Marquart GD, Tabor KM, Brown M, Strykowski JL, Varshney GK, LaFave MC,  
562 Mueller T, Burgess SM, Higashijima S, Burgess HA. A 3D Searchable Database  
563 of Transgenic Zebrafish Gal4 and Cre Lines for Functional Neuroanatomy  
564 Studies. *Front Neural Circuits* (2015) doi:10.3389/fncir.2015.00078
- 565 58. Hawrylycz M, Baldock RA, Burger A, Hashikawa T, Johnson GA, Martone M, Ng  
566 L, Lau C, Larsen SD, Nissanov J, et al. Digital atlasing and standardization in the  
567 mouse brain. *PLoS Comput Biol* (2011) doi:10.1371/journal.pcbi.1001065
- 568 59. Milyaev N, Osumi-sutherland D, Reeve S, Burton N, Baldock RA, Armstrong JD.  
569 The virtual fly brain browser and query interface. *Bioinformatics* (2012)  
570 doi:10.1093/bioinformatics/btr677
- 571 60. Peng H, Chung P, Long F, Qu L, Jenett A, Seeds AM, Myers EW, Simpson JH.  
572 BrainAligner: 3D registration atlases of Drosophila brains. *Nat Methods* (2011)  
573 doi:10.1038/nmeth.1602
- 574 61. Mueller T, Wullimann M. *Atlas of Early Zebrafish Brain Development: A Tool for*  
575 *Molecular Neurogenetics*. (2015).
- 576 62. Dunn TW, Mu Y, Narayan S, Randlett O, Naumann EA, Yang CT, Schier AF,

- 577 Freeman J, Engert F, Ahrens MB. Brain-wide mapping of neural activity  
578 controlling zebrafish exploratory locomotion. *Elife* (2016) doi:10.7554/eLife.12741
- 579 63. Ronneberger O, Liu K, Rath M, Rue D, Mueller T, Skibbe H, Drayer B, Schmidt T,  
580 Filippi A, Nitschke R, et al. ViBE-Z: A framework for 3D virtual colocalization  
581 analysis in zebrafish larval brains. *Nat Methods* (2012) doi:10.1038/nmeth.2076
- 582 64. Ahrens MB, Orger MB, Robson DN, Li JM, Keller PJ. Whole-brain functional  
583 imaging at cellular resolution using light-sheet microscopy. *Nat Methods* (2013)  
584 doi:10.1038/nmeth.2434
- 585 65. Muto A, Ohkura M, Abe G, Nakai J, Kawakami K. Real-time visualization of  
586 neuronal activity during perception. *Curr Biol* (2013) **23**:307–311.  
587 doi:10.1016/j.cub.2012.12.040
- 588 66. Gallo ND, Jeffery WR. Evolution of space dependent growth in the teleost  
589 *Astyanax mexicanus*. *PLoS One* (2012) doi:10.1371/journal.pone.0041443
- 590 67. Jeong I, Kim E, Kim S, Kim H-K, Lee D-W, Jae Young S, Park H-C. mRNA  
591 expression and metabolic regulation of npy and agrp1/2 in the zebrafish brain.  
592 *Neurosci Lett* (2018) **668**:73–79.
- 593 68. Miyasaka N, Arganda-Carreras I, Wakisaka N, Masuda M, Sümbül U, Seung HS,  
594 Yoshihara Y. Olfactory projectome in the zebrafish forebrain revealed by genetic  
595 single-neuron labelling. *Nat Commun* (2014) doi:10.1038/ncomms4639
- 596 69. Hinaux H, Alié A, Devos L, Elipot Y, Bibliowicz J, Blin M, Rétaux S. Sensory  
597 evolution in blind cavefish is driven by early embryonic events during gastrulation  
598 and neurulation. *Development* (2016) doi:10.1242/dev.141291
- 599 70. Yoshizawa M, Jeffery WR, van Netten SM, McHenry MJ. The sensitivity of lateral  
600 line receptors and their role in the behavior of Mexican blind cavefish (*Astyanax*  
601 *mexicanus*). *J Exp Biol* (2013) doi:10.1242/jeb.094599
- 602 71. Bibliowicz J, Alié A, Espinasa L, Yoshizawa M, Blin M, Hinaux H, Legendre L,  
603 Père S, Rétaux S. Differences in chemosensory response between eyed and  
604 eyeless *Astyanax mexicanus* of the Rio Subterráneo cave. *Evodevo* (2013)  
605 doi:10.1186/2041-9139-4-25

- 606 72. Yoshizawa M, Jeffery WR, van Netten SM, McHenry MJ. The sensitivity of lateral  
607 line receptors and their role in the behavior of Mexican blind cavefish (*Astyanax*  
608 *mexicanus*). *J Exp Biol* (2014) **217**:886–895. doi:10.1242/jeb.094599
- 609 73. Teyke T. Morphological differences in neuromasts of the blind cave fish *Astyanax*  
610 *hubbsi* and the sighted river fish *Astyanax mexicanus*. *Brain Behav Evol* (1990)  
611 **35**:23–30. doi:10.1159/000115853
- 612 74. McCormick CA, Braford MR. Organization of inner ear endorgan projections in the  
613 goldfish, *Carassius auratus*. *Brain Behav Evol* (1994) doi:10.1159/000113634
- 614 75. Puzdrowski R. Peripheral Distribution and Central Projections of the Lateral-Line  
615 Nerves in Goldfish, *Carasius auratus*. *Brain Behav Evol* (1989)
- 616 76. Vendrell-Llopis N, Yaksi E. Evolutionary conserved brainstem circuits encode  
617 category, concentration and mixtures of taste. *Sci Rep* (2015)  
618 doi:10.1038/srep17825
- 619 77. Zheng Z, Lauritzen JS, Perlman E, Robinson CG, Nichols M, Milkie D, Torrens O,  
620 Price J, Fisher CB, Sharifi N, et al. A Complete Electron Microscopy Volume of  
621 the Brain of Adult *Drosophila melanogaster*. *Cell* (2018)  
622 doi:10.1016/j.cell.2018.06.019
- 623 78. Kawakami K, Shima A, Kawakami N. Identification of a functional transposase of  
624 the Tol2 element, an Ac-like element from the Japanese medaka fish, and its  
625 transposition in the zebrafish germ lineage. *Proc Natl Acad Sci* (2000) **97**:11403–  
626 11408. doi:10.1073/pnas.97.21.11403
- 627 79. Scott EK, Mason L, Arrenberg AB, Ziv L, Gosse NJ, Xiao T, Chi NC, Asakawa K,  
628 Kawakami K, Baier H. Targeting neural circuitry in zebrafish using GAL4 enhancer  
629 trapping. *Nat Methods* (2007) **4**:323–326. doi:10.1038/nmeth1033
- 630 80. deCarvalho TN, Akitake CM, Thisse C, Thisse B, Halpern ME. Aversive cues fail  
631 to activate fos expression in the asymmetric olfactory-habenula pathway of  
632 zebrafish. *Front Neural Circuits* (2013) **7**: doi:10.3389/fncir.2013.00098
- 633 81. Stahl BA, Peuß R, McDole B, Kenzior A, Jaggard JB, Gaudenz K, Krishnan J,  
634 McGaugh SE, Duboue ER, Keene AC, et al. Stable transgenesis in *Astyanax*

- 635           mexicanus using the Tol2 transposase system. *Dev Dyn* (2019)  
636           doi:10.1002/dvdy.32
- 637   82.   Stahl BA, Jaggard JB, Chin JSR, Kowalko JE, Keene AC, Duboué ER.  
638        Manipulation of Gene Function in Mexican Cavefish. *J Vis Exp* (2019)  
639        doi:10.3791/59093
- 640   83.   Elipot Y, Legendre L, Père S, Sohm F, Rétaux S. *Astyanax* Transgenesis and  
641        Husbandry: How Cavefish Enters the Laboratory. *Zebrafish* (2014)  
642        doi:10.1089/zeb.2014.1005
- 643   84.   Borowsky R. Breeding *Astyanax mexicanus* through natural spawning. *Cold*  
644        *Spring Harb Protoc* (2008) doi:10.1101/pdb.prot5091
- 645   85.   Vacca LL. *Laboratory Manual of Histochemistry*. Raven Pr (1985).
- 646   86.   Schindelin J, Arganda-Carreras I, Frise E, Kaynig V, Longair M, Pietzsch T,  
647        Preibisch S, Rueden C, Saalfeld S, Schmid B, et al. Fiji: an open-source platform  
648        for biological-image analysis. *Nat Methods* (2012) doi:10.1038/nmeth.2019
- 649   87.   Thévenaz P, Ruttimann UE, Unser M. A Pyramid Approach to Sub-Pixel  
650        Registration Based on Intensity Mailing address. *IEEE Trans Image Process*  
651        (1998) doi:10.1109/83.650848
- 652

653 **Figure Legends**

654 **Figure 1. Overview of experimental design.** (A) Map of Mexico with location of Molino  
655 (red), Pachón (green) and Tinaja (black) caves. (B) Flow chart diagraming experimental  
656 design and procedure.

657

658 **Figure 2. Three-dimensional reconstruction reveals regression of the optic tectum.**

659 (A) 3-D reconstructions of Surface, Pachón, Tinaja and Molino with demarcated optic  
660 tectum (red) and optic neuropil (blue) displayed. (B) Images of demarcated sections that  
661 were Nissl stained (left) and a cartoon of demarcated region (right). (C) 3-D reconstruction  
662 of the optic tectum and optic neuropil only, displayed from an anterior view. (D)  
663 Quantification of the volume of optic tectum, normalized to the size of the total brain, for  
664 surface fish and for the three cave populations. In order to examine significance,  
665 volumetric data for cavefish brains were pooled. Optic tectum of cavefish was significantly  
666 smaller than those of surface fish conspecifics (surface fish  $19.8 \pm 0.55$ ; cavefish  $7.4 \pm$   
667  $0.97$ ; t-test  $t=6.921$ ,  $p<0.05$ ). (E) Quantification of the volume of optic neuropil. The optic  
668 neuropil was also significantly smaller in cavefish, compared to surface conspecifics  
669 (surface fish  $3.7 \pm 0.22$ ; cave fish  $2.5 \pm 0.21$ ; t-test  $t=3.272$ ,  $p<0.05$ ). Graphs in D and E  
670 are the mean  $\pm$  standard error of the mean. Asterisk represent significance below  $p = 0.05$ .  
671 Blue shapes on bar graphs denote males, whereas pink denotes female. Square points  
672 on graphs represent Pachón, triangle points on graphs represent Tinaja and diamond  
673 points on graphs represent Molino.

674

675 **Figure 3. Expansion of telencephalon in cavefish populations.** (A) 3-D reconstructions  
676 of Surface, Pachón, Tinaja, and Molino with demarcated telencephalon (purple) displayed.  
677 (B) Images of demarcated sections that were Nissl stained (left) and a cartoon of  
678 demarcated region (right). (C) Close up view of the 3-D reconstruction of the  
679 telencephalon from an anterior view. (D) Quantification of telencephalic volume shows  
680 expansion of the forebrain in cavefish (surface fish  $14.19 \pm 1.7$ ; cavefish  $22.13 \pm 0.89$ ; t-  
681 test  $t=4.397$ ,  $p<0.05$ ). Graph in D is the mean  $\pm$  standard error of the mean. Asterisk  
682 represent significance below  $p=0.05$ . Blue points on bar graphs denote males, whereas  
683 light red denotes female. Square points on graphs represent Pachón, triangle points on  
684 graphs represent Tinaja and diamond points on graphs represent Molino.

685

686

687 **Figure 4. Quantification of the thalamus and habenulae reveals difference in some,**  
688 **but not all, subnuclei.** (A) 3-D reconstructions of Surface, Pachón, Tinaja, and Molino  
689 with demarcated thalamus and habenula displayed. (B) Images of demarcated sections  
690 that were Nissl stained (left) and a cartoon of demarcated region (right). (C) 3-D  
691 reconstruction of the thalamus and habenulae only, displayed from an anterior view. (D)  
692 Quantification of the total volume of the thalamus revealed no significant differences  
693 (surface fish  $0.28 \pm 0.07$ , cavefish  $0.356 \pm 0.04$ , t-test  $t=0.9828$ ,  $p=0.3585$ ). (E)  
694 Quantification of the total volume of the habenulae revealed no significant differences.  
695 (surface fish  $0.12 \pm 0.013$ , cavefish  $0.20 \pm 0.03$ , t-test  $t=1.545$ ,  $p=.1609$ ). Graphs in D and  
696 E are the mean  $\pm$  standard error of the mean. Asterisk represent significance below  
697  $p=0.05$ . Color key for subnuclei (Chab= Habenula Commissure, Had= Dorsal Habenular  
698 Nucleus, Hav= Ventral Habenular Nucleus, Tvm= Ventromedial thalamic nucleus, Tvl=  
699 Ventrolateral thalamic nucleus, Tcp= Central posterior thalamic nucleus, Tp= Posterior  
700 thalamic nucleus, Ti= Intermediate thalamic nucleus). Blue points on bar graphs denote  
701 males, whereas light red denotes female. Square points on graphs represent Pachón,  
702 triangle points on graph represent Tinaja and diamond points on graph represent Molino.  
703

704 **Figure 5. Quantification of the hypothalamus reveals expansion in cave populations.**  
705 (A) 3-D reconstructions of Surface, Pachón, Tinaja and Molino with demarcated  
706 hypothalamus displayed. (B) Images of demarcated sections that were Nissl stained (left)  
707 and a cartoon of demarcated region (right). (C) 3-D reconstruction of the hypothalamus  
708 only, displayed from an anterior view. (D) Quantification of the total volume of the  
709 hypothalamus revealed significant differences (surface fish  $2.25 \pm 0.16$ , cavefish  $3.18 \pm$   
710  $0.15$ , t-test  $t=3.802$ ,  $p<0.05$ ). Graph in D is the mean  $\pm$  standard error of the mean. Asterisk  
711 represent significance below  $p=0.05$ . Color key for subnuclei (Hv= Ventral hypothalamus,  
712 Hl= Lateral hypothalamus, Hd= Dorsal Hypothalamus, Hc= Caudal hypothalamus, PTN=  
713 Posterior tuberculum, ATN= Anterior tuberculum, PON= Paraventricular organ, SCN=  
714 Superchiasmatic nucleus). Blue points on bar graphs denote males, whereas light red  
715 denotes female. Square points on graphs represent Pachón, triangle points on graphs  
716 represent Tinaja and diamond points on graphs represent Molino.  
717



718 **Supplemental Figure 1. Analysis of different thalamic subnuclei reveals expansion**  
719 **of some, but not all, regions.** (A) Quantification of the posterior thalamic nucleus shows  
720 an expansion of volume (surface fish  $0.02 \pm 0.023$ , cavefish  $0.042 \pm 0.004$ , t-test  $t=5.656$ ,  
721  $p = 0.032$ ). (B-C) analysis of volumes from anterior thalamic nuclei (B) and ventrolateral  
722 thalamic nucleus (C) revealed difference that approached significance (Ta = surface fish  
723  $0.010 \pm 0.001$ , cavefish  $0.06 \pm 0.02$ ; t-test  $t=1.907$ ;  $p=0.098$ ; Tvl = surface fish  $0.04 \pm 0.01$ ,  
724 cavefish  $0.07 \pm 0.013$ ; t-test  $t=1.474$ ;  $p=0.184$ ). (D-F) There were no significant difference  
725 for ventromedial thalamic nucleus (D), intermediate thalamic nucleus (E), and central  
726 posterior thalamic nucleus (F) (Tvm = surface fish  $0.03 \pm 0.006$ ; cavefish  $0.04 \pm 0.008$ ; t-  
727 test  $t=1.203$ ;  $p=0.268$ ; Ti = surface fish  $0.015 \pm 0.008$ ; cavefish  $0.013 \pm 0.003$ ; t-test  
728  $t=0.3565$ ,  $p=0.732$ ; Tcp = surface fish  $0.134 \pm 0.05$ ; cavefish  $0.092 \pm 0.013$ ; t-test  $t=1.083$ ,  
729  $p=0.315$ ) All graphs are the mean  $\pm$  standard error of the mean. Blue points on bar graphs  
730 denote males, whereas light red denotes female. Square points on graphs represent  
731 Pachón, triangle points on graphs represent Tinaja and diamond points on graphs  
732 represent Molino.  
733

734 **Supplemental Figure 2. Analysis of different habenulae subnuclei reveals**  
735 **expansion of subnuclei, some approaching significance.** (A) Quantification of the  
736 dorsal habenular nucleus shows an expansion in cavefish approaching significance  
737 (surface fish  $0.05 \pm 0.01$ , cavefish  $0.08 \pm 0.01$ ; t-test  $t=2.01$ ;  $p=0.079$ ). (B) Quantification  
738 of ventral habenular nucleus also showed an expansion in cavefish although not  
739 statistically significant (surface fish  $0.06 \pm 0.003$ , cavefish  $0.11 \pm 0.02$ ; t-test  $t=1.542$ ;  
740  $p=0.16$ ). (C) Analysis of the habenula commissure showed no significance between  
741 morphs (surface fish  $0.004 \pm 0.0009$ , cavefish  $0.057 \pm 0.0019$ ; t-test  $t=0.5352$ ;  $p=0.61$ ).  
742 All graphs are the mean  $\pm$  standard error of the mean. Blue points on bar graphs denote  
743 males, whereas light red denotes female. Square points on graphs represent Pachón,  
744 triangle points on graphs represent Tinaja and diamond points on graphs represent  
745 Molino.  
746

747 **Supplemental Figure 3. Analysis of different hypothalamic subnuclei reveals**  
748 **significant expansion of lateral, dorsal, and caudal hypothalamus in cavefish while**  
749 **others remain similar to surface fish.** (A) Analysis of the superchiasmatic nucleus  
750 showed no difference between morphs (surface fish  $0.07 \pm 0.01$ , cavefish  $0.072 \pm 0.005$ ;

751 t-test  $t=0.0637$ ;  $p=0.95$ ). (B-D) Significant differences were observed between the lateral  
752 hypothalamus (HI) (B), dorsal hypothalamus (Hd) (C) and caudal hypothalamus (Hc) (D)  
753 (HI = surface fish  $0.095 \pm 0.04$ , cavefish  $0.12 \pm 0.014$ ; t-test  $t=2.506$ ;  $p<0.05$ , Hd =surface  
754 fish  $0.5 \pm 0.04$ , cavefish  $0.78 \pm 0.05$ ; t-test  $t=3.034$ ;  $p<0.05$ , Hc =surface fish  $0.16 \pm 0.05$ ,  
755 cavefish  $0.38 \pm 0.04$ ; t-test  $t=3.034$ ;  $p<0.05$ ). (E-G) Analysis of the ventral hypothalamus  
756 (Hv) (E), paraventricular organ (PVO) (D) and preoptic nucleus (PON) showed an  
757 enlargement in cavefish that approached significance (Hv =surface fish  $0.16 \pm 0.02$ ,  
758 cavefish  $0.23 \pm 0.02$ ; t-test;  $p=0.07$ , PVO =surface fish  $0.034 \pm 0.008$ , cavefish  $0.06 \pm$   
759  $0.007$ ; t-test  $t=2.12$ ;  $p=0.07$ , PON =surface fish  $0.42 \pm 0.022$ , cavefish  $0.56 \pm 0.05$ ; t-test  
760  $t=2.098$ ;  $p=0.07$ ). (H-I) Quantification of the anterior tuberculum (ATN) (H) and posterior  
761 tuberculum (PTN) (I) showed no difference between morphs (ATN =surface fish  $0.66 \pm$   
762  $0.1$ , cavefish  $0.61 \pm 0.1$ ; t-test  $t=0.2833$ ;  $p=0.78$ , PTN=surface fish  $0.14 \pm 0.03$ , cavefish  
763  $0.21 \pm 0.03$ ; t-test  $t=1.357$ ;  $p=0.22$ ). All graphs are the mean  $\pm$  standard error of the mean.  
764 Blue points on bar graphs denote males, whereas light red denotes female. Square points  
765 on graphs represent Pachón, triangle points on graphs represent Tinaja and diamond  
766 points on graphs represent Molino.

767

768 **Supplemental Movie 1. Three-dimensional reconstruction of whole brain from**  
769 **surface fish.**

770

771 **Supplemental Movie 2. Three-dimensional reconstruction of whole brain from**  
772 **Pachón cavefish.**

773

774 **Supplemental Movie 3. Three-dimensional reconstruction of whole brain from**  
775 **Tinaja cavefish.**

776

777 **Supplemental Movie 4. Three-dimensional reconstruction of whole brain from**  
778 **Molino cavefish.**

779

780 **Supplemental Movie 5. Three-dimensional reconstruction of hypothalamus from**  
781 **surface cavefish.**

782

783 **Supplemental Movie 6. Three-dimensional reconstruction of hypothalamus from**  
784 **Pachón cavefish.**

785

786 **Supplemental Movie 7. Three-dimensional reconstruction of hypothalamus from**  
787 **Tinaja cavefish.**

788

789 **Supplemental Movie 8. Three-dimensional reconstruction of hypothalamus from**  
790 **Molino cavefish.**

Figure 1

A

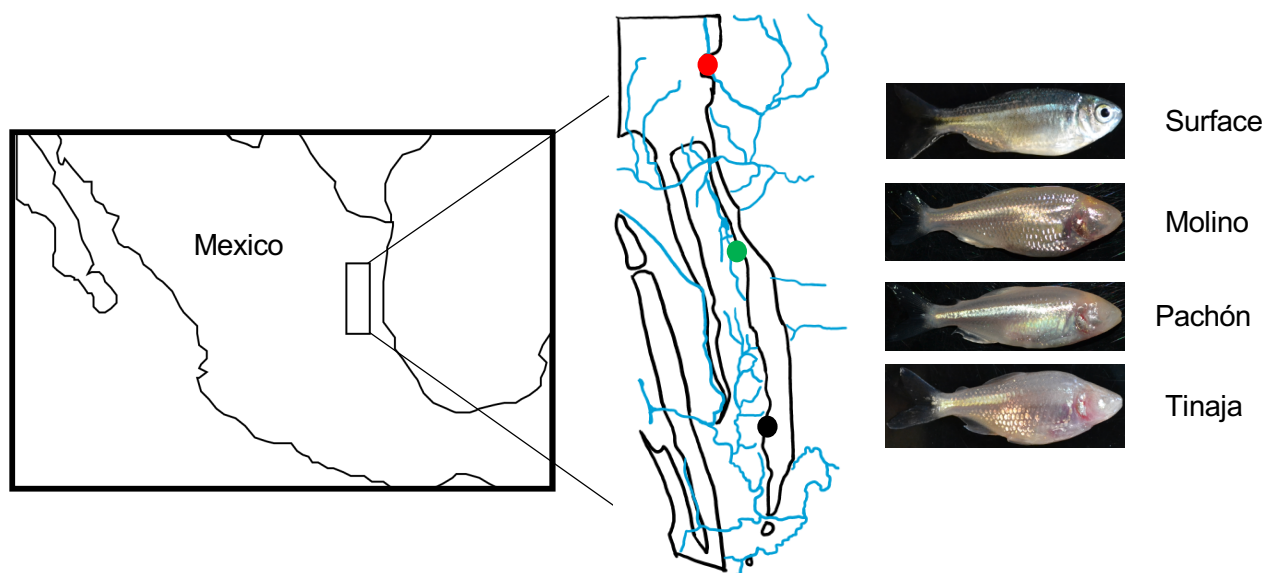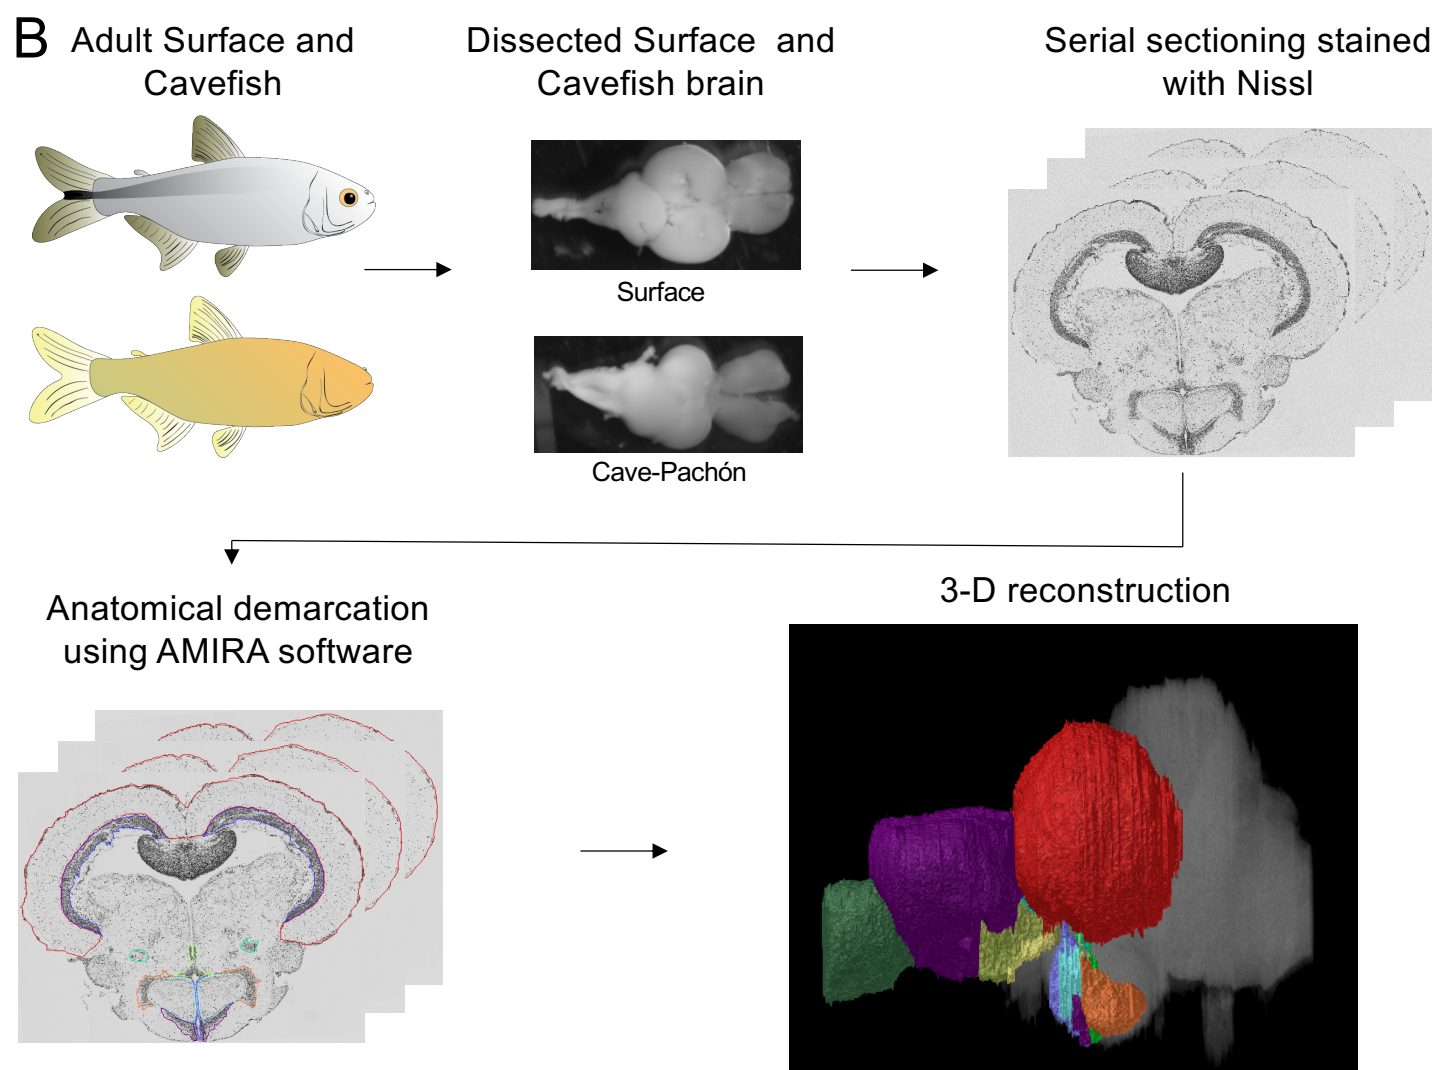

Figure 2.

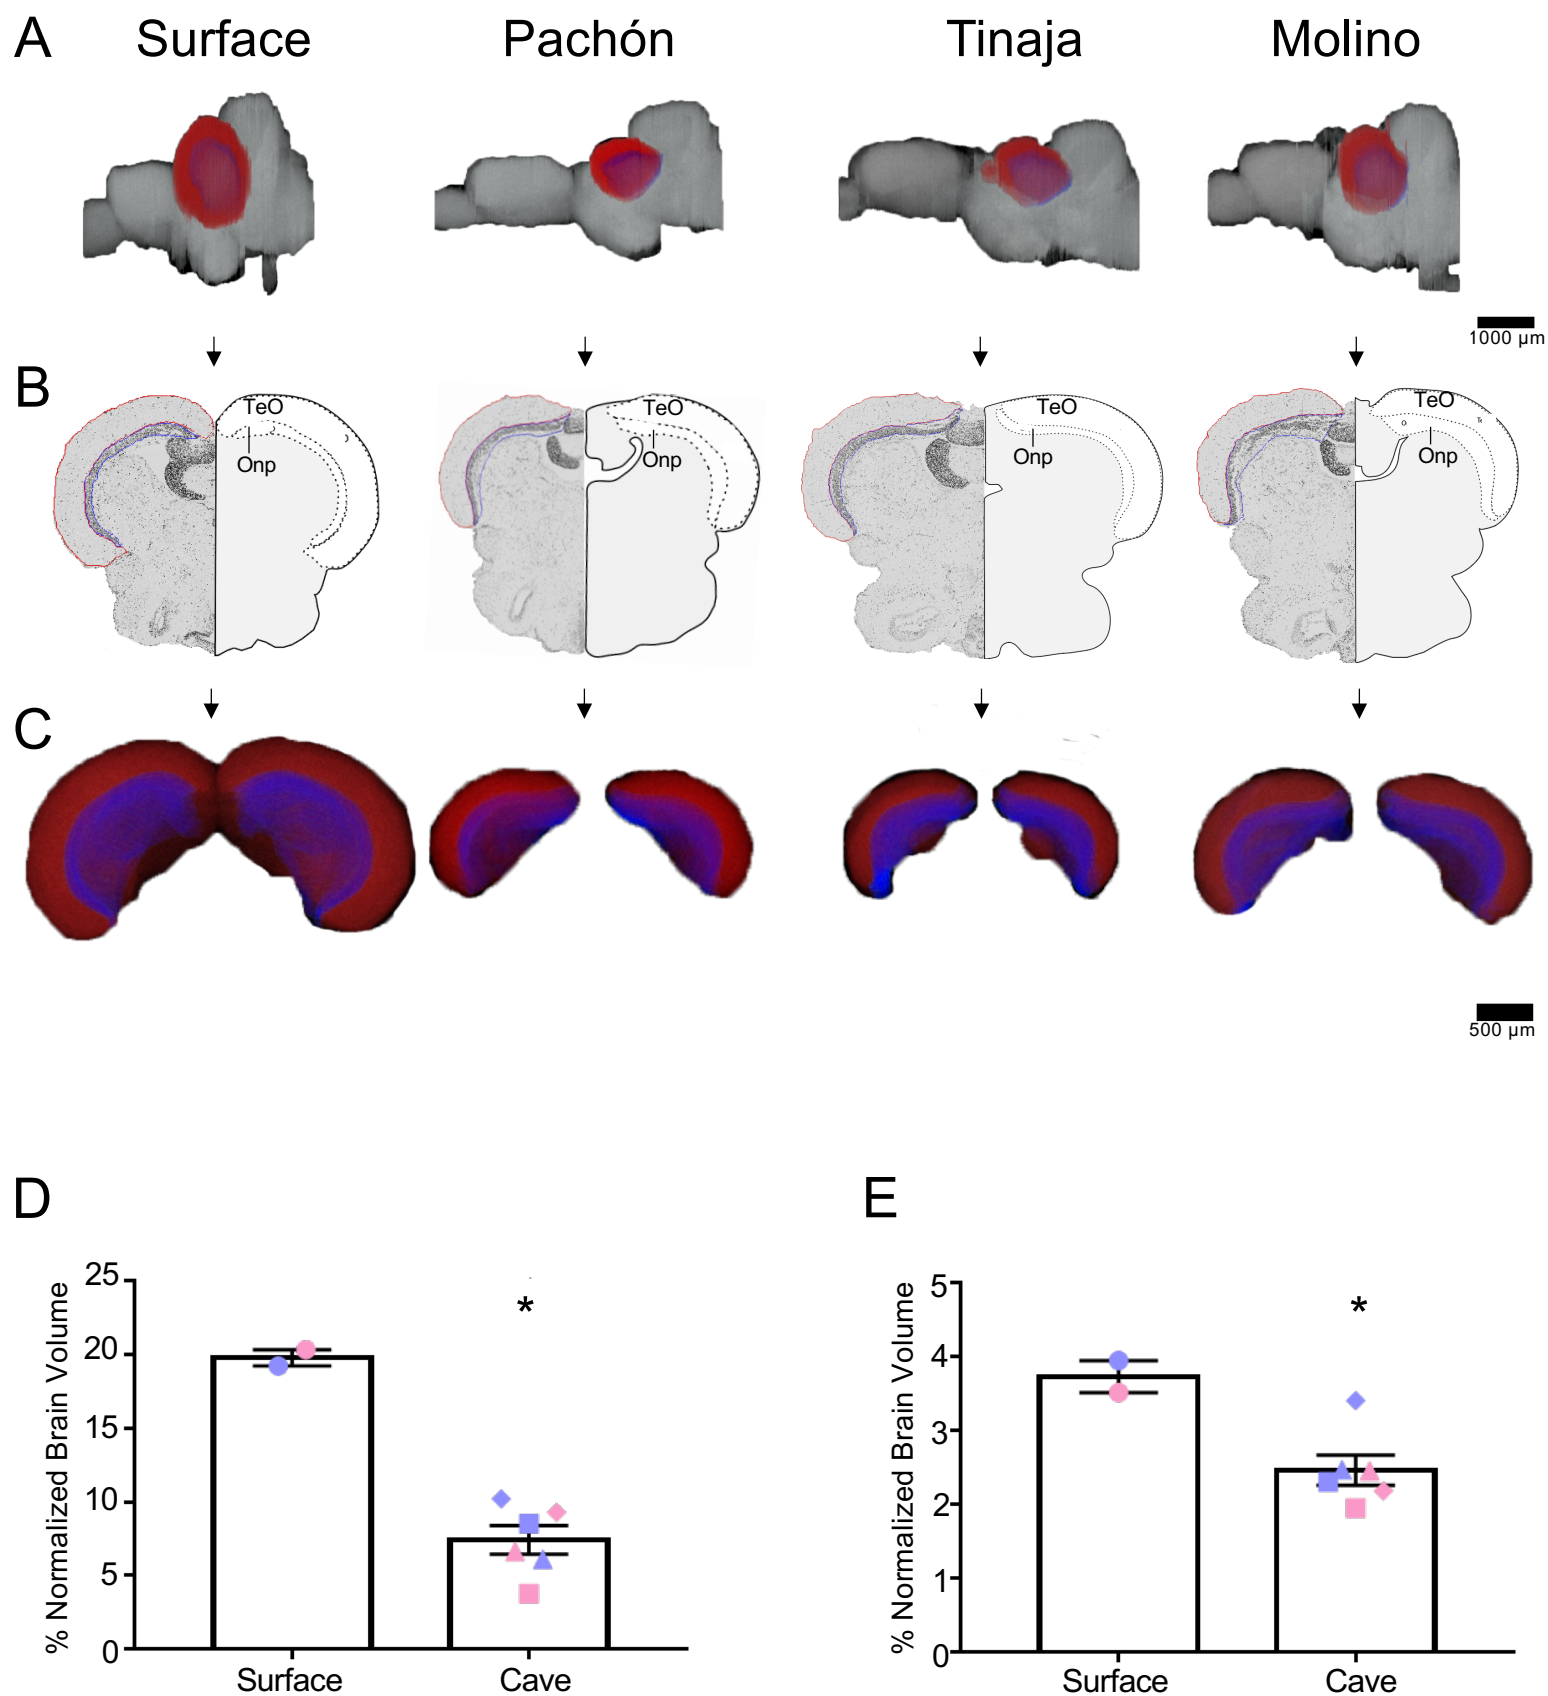

Figure 3.

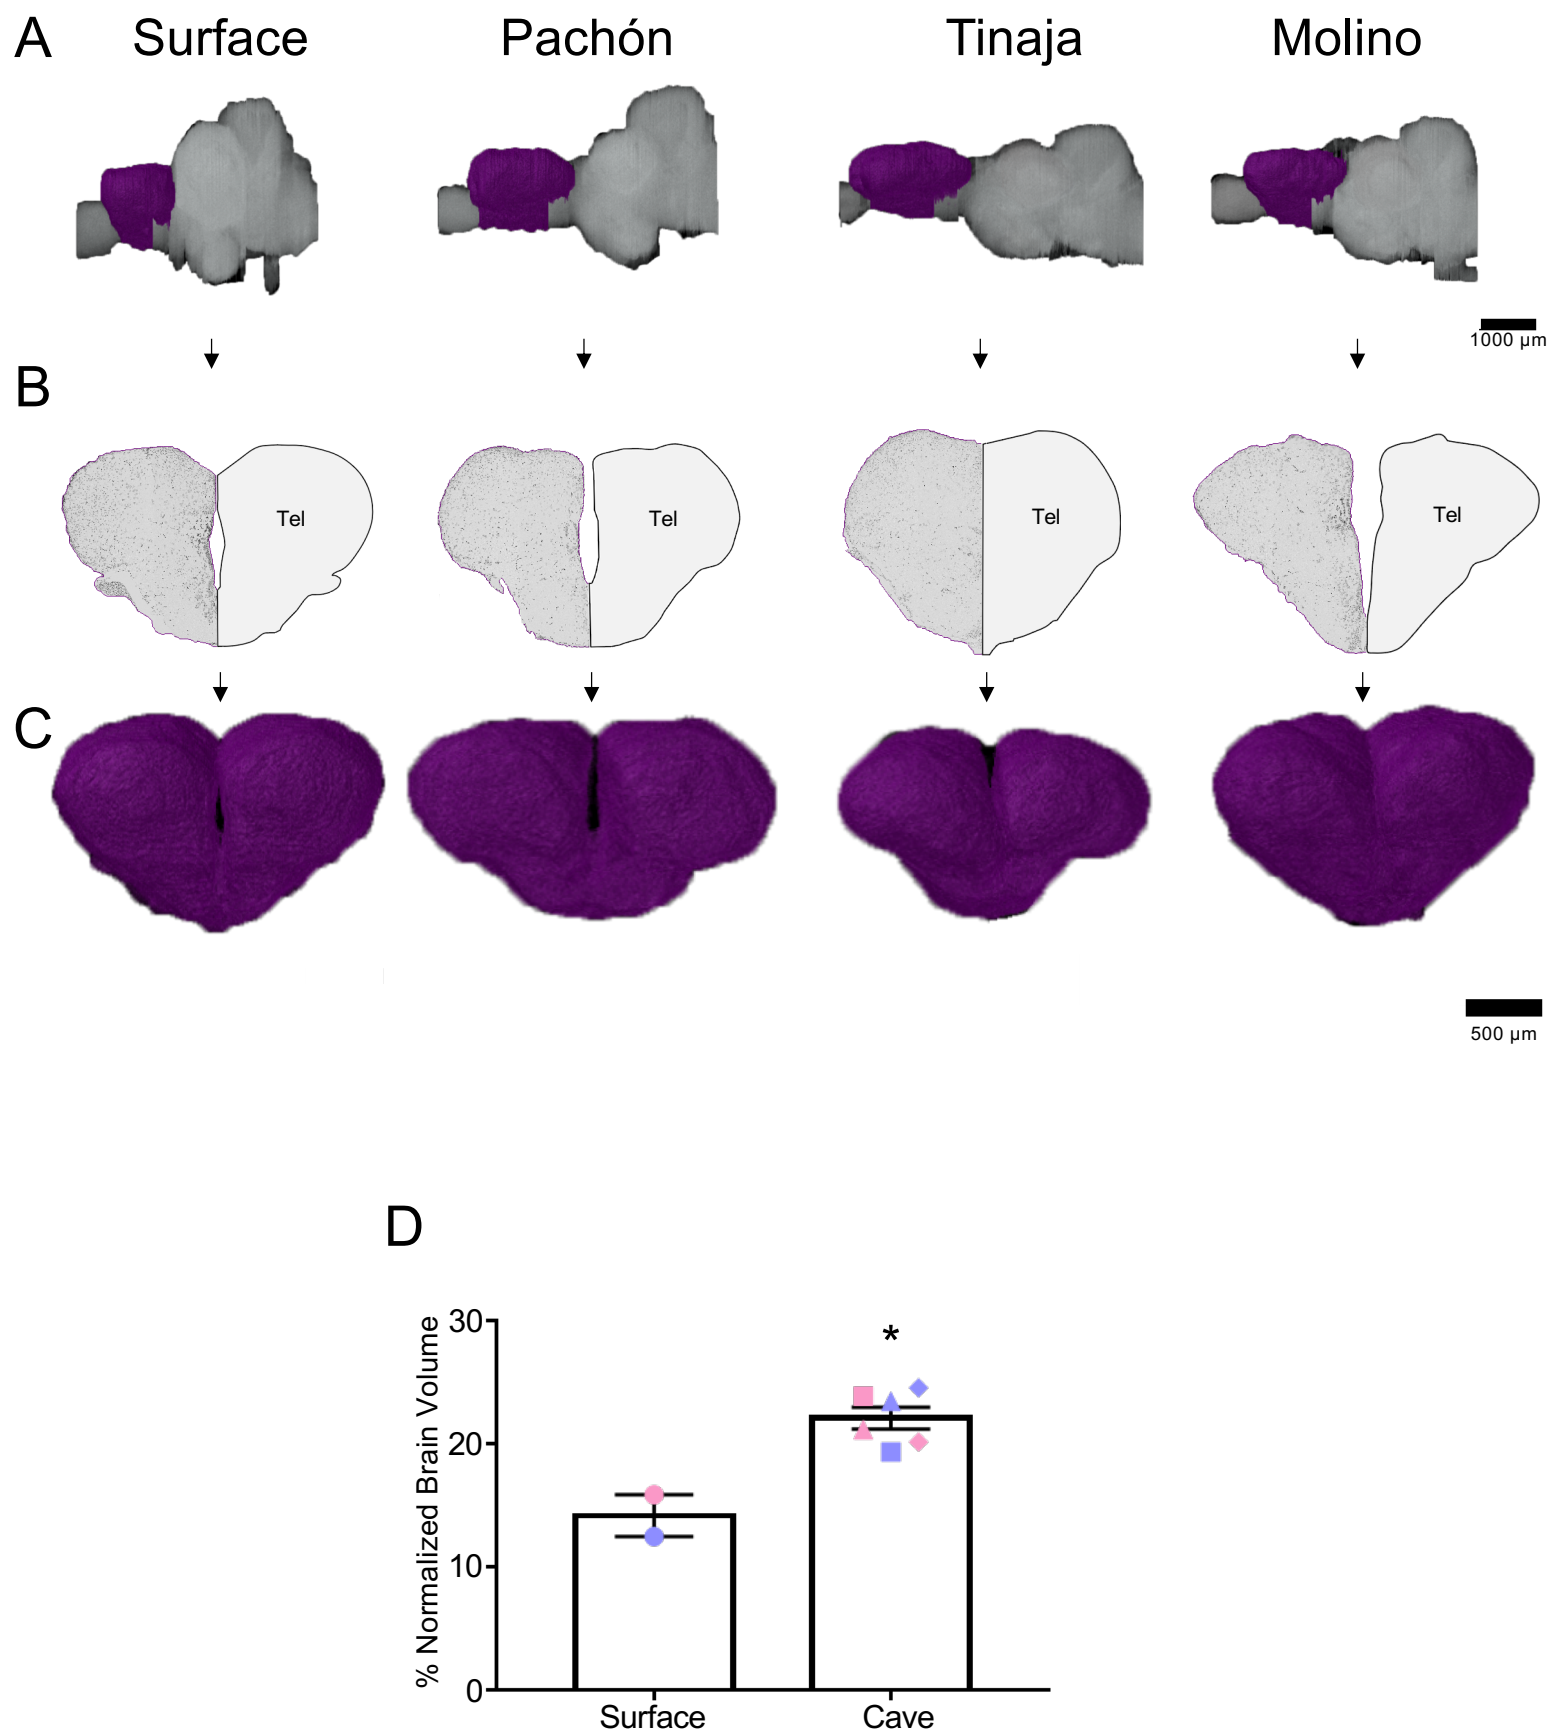

Figure 4.

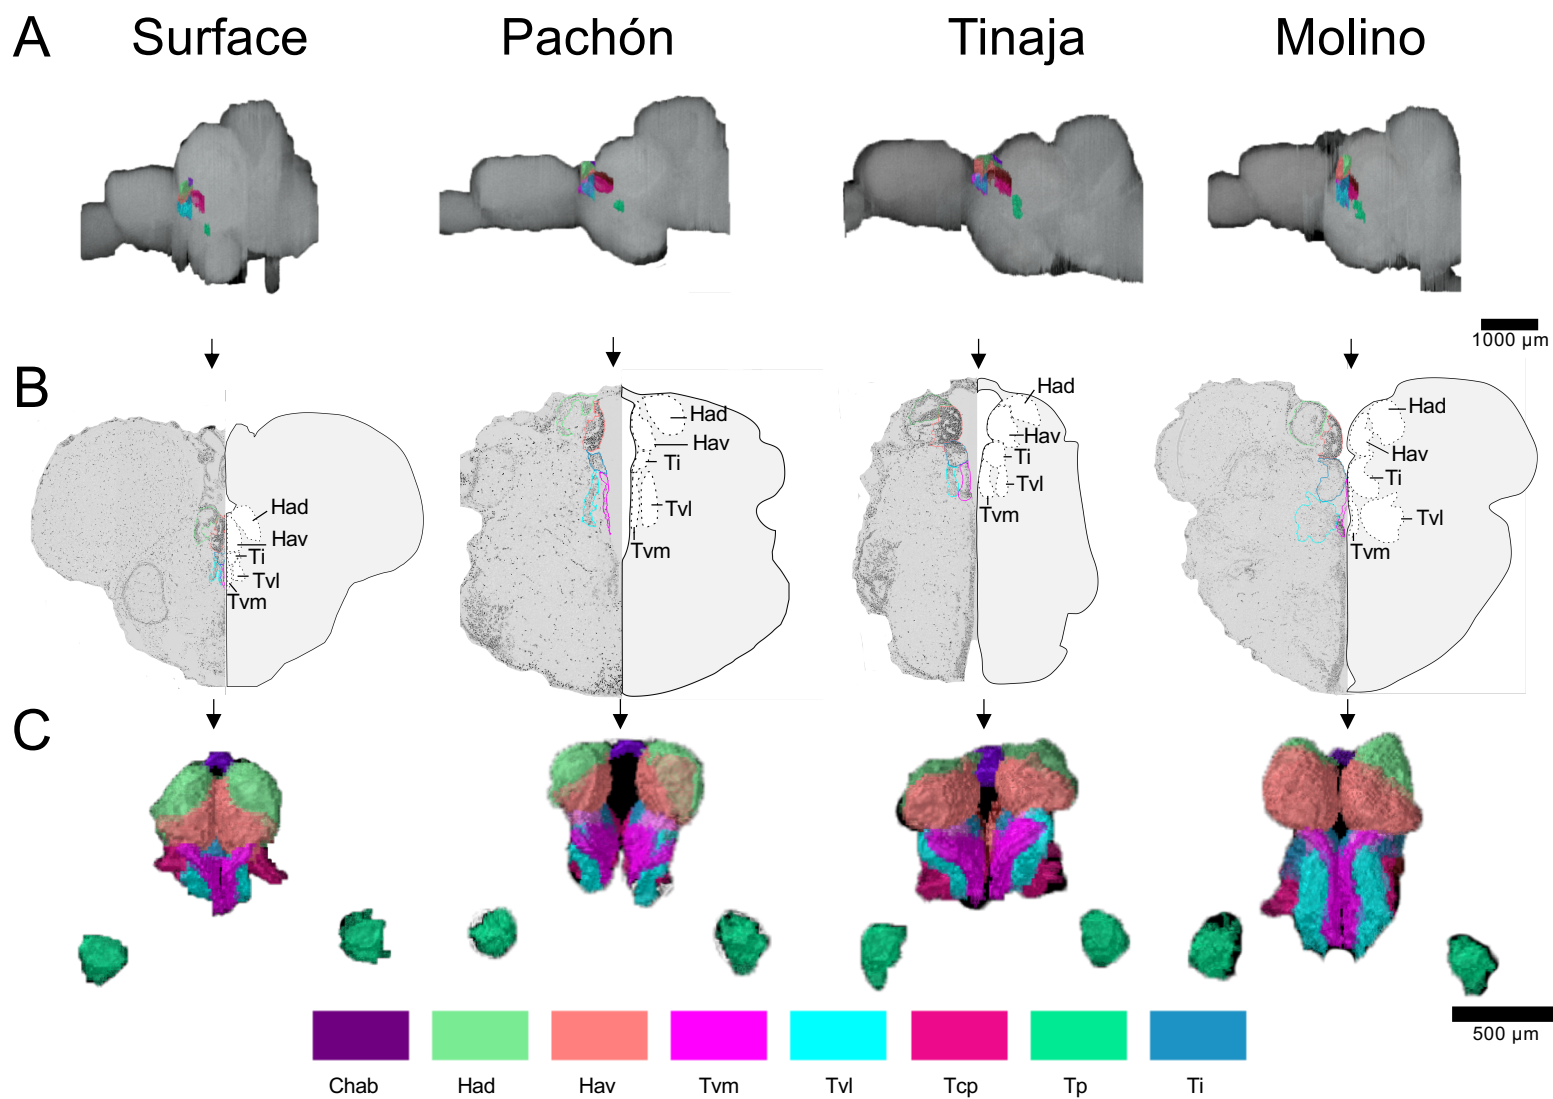

**D**

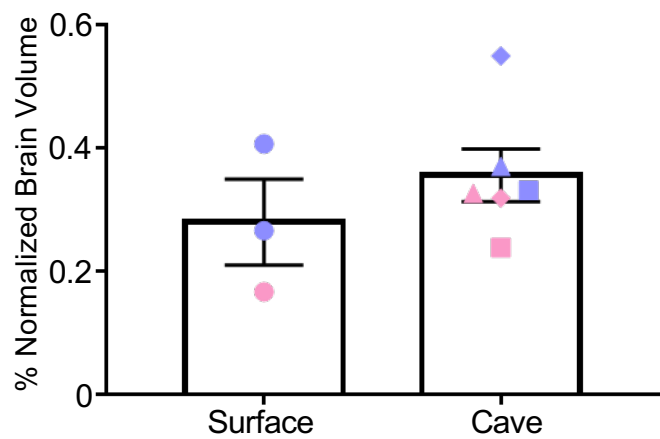

**E**

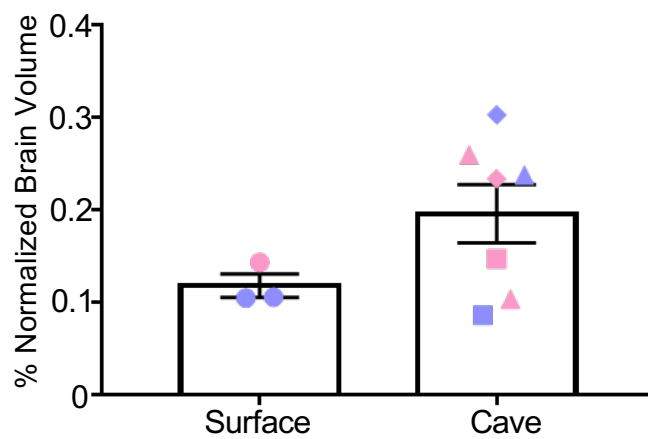

Figure 5.

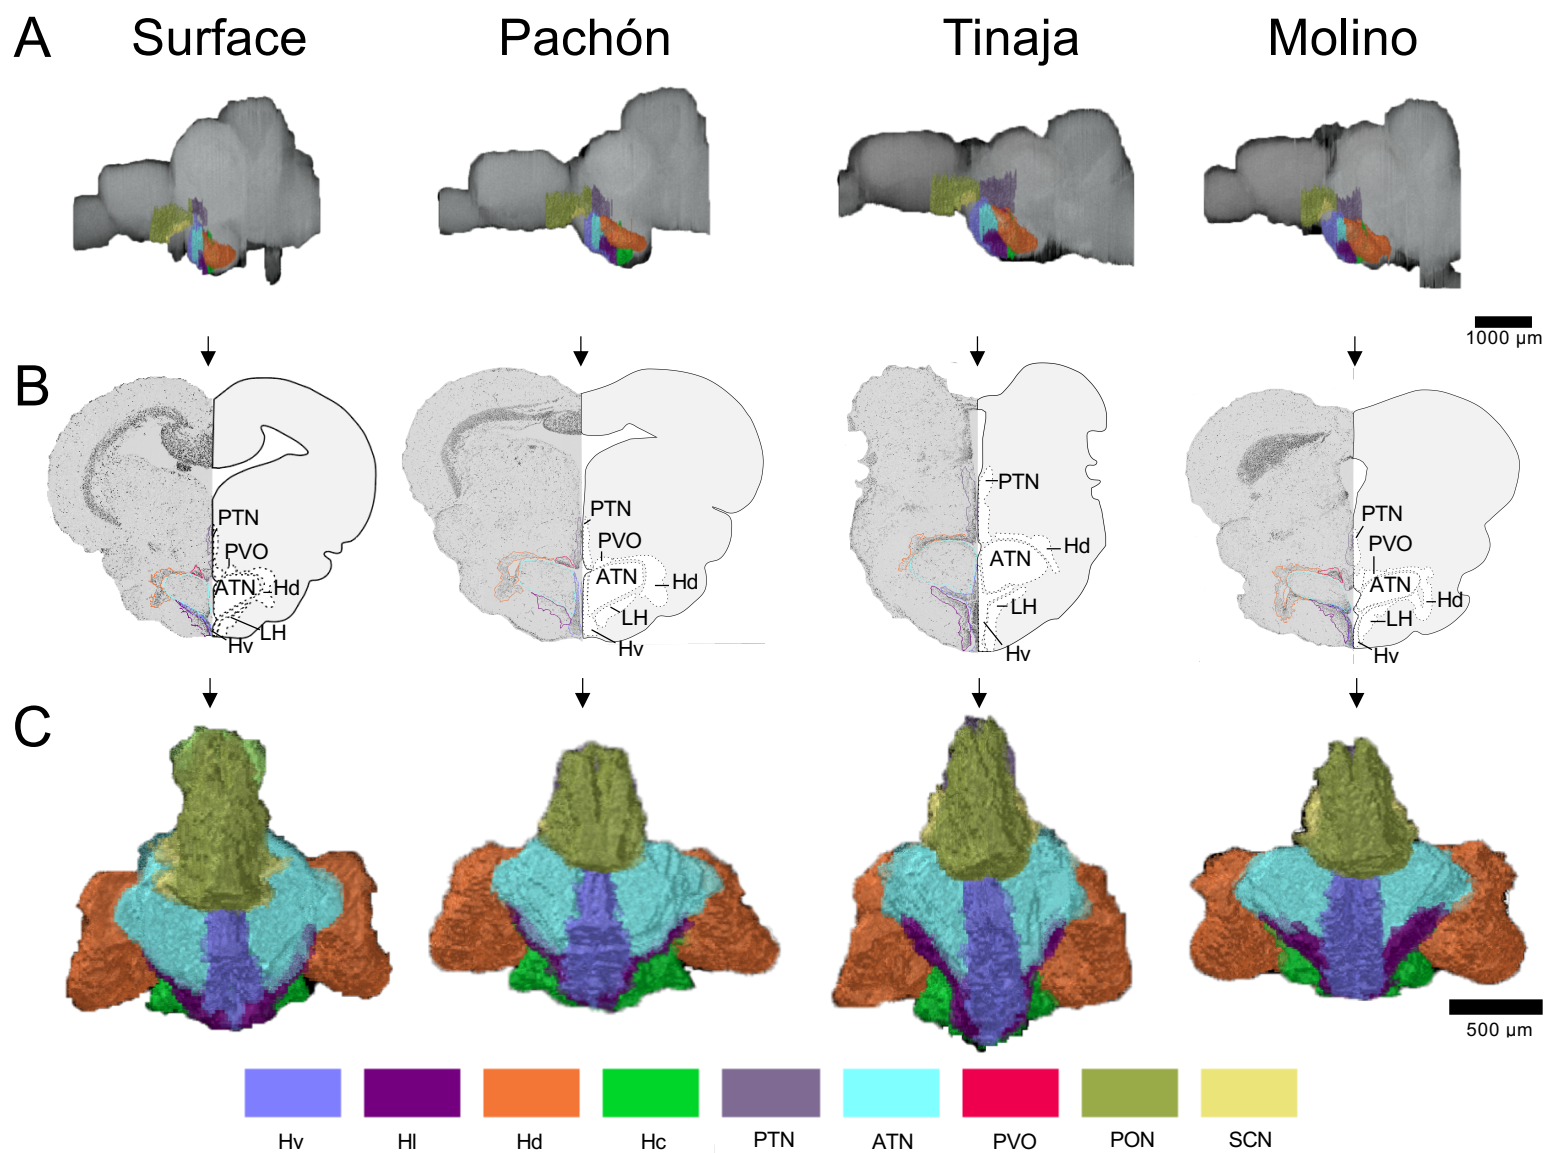

**D**

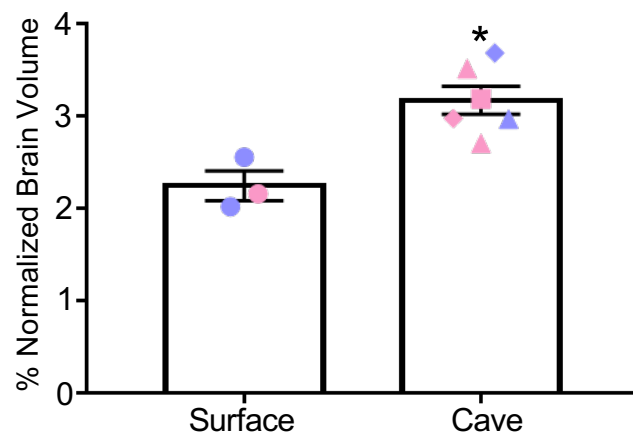



Supplementary Figure 1. Thalamus sub-nuclei

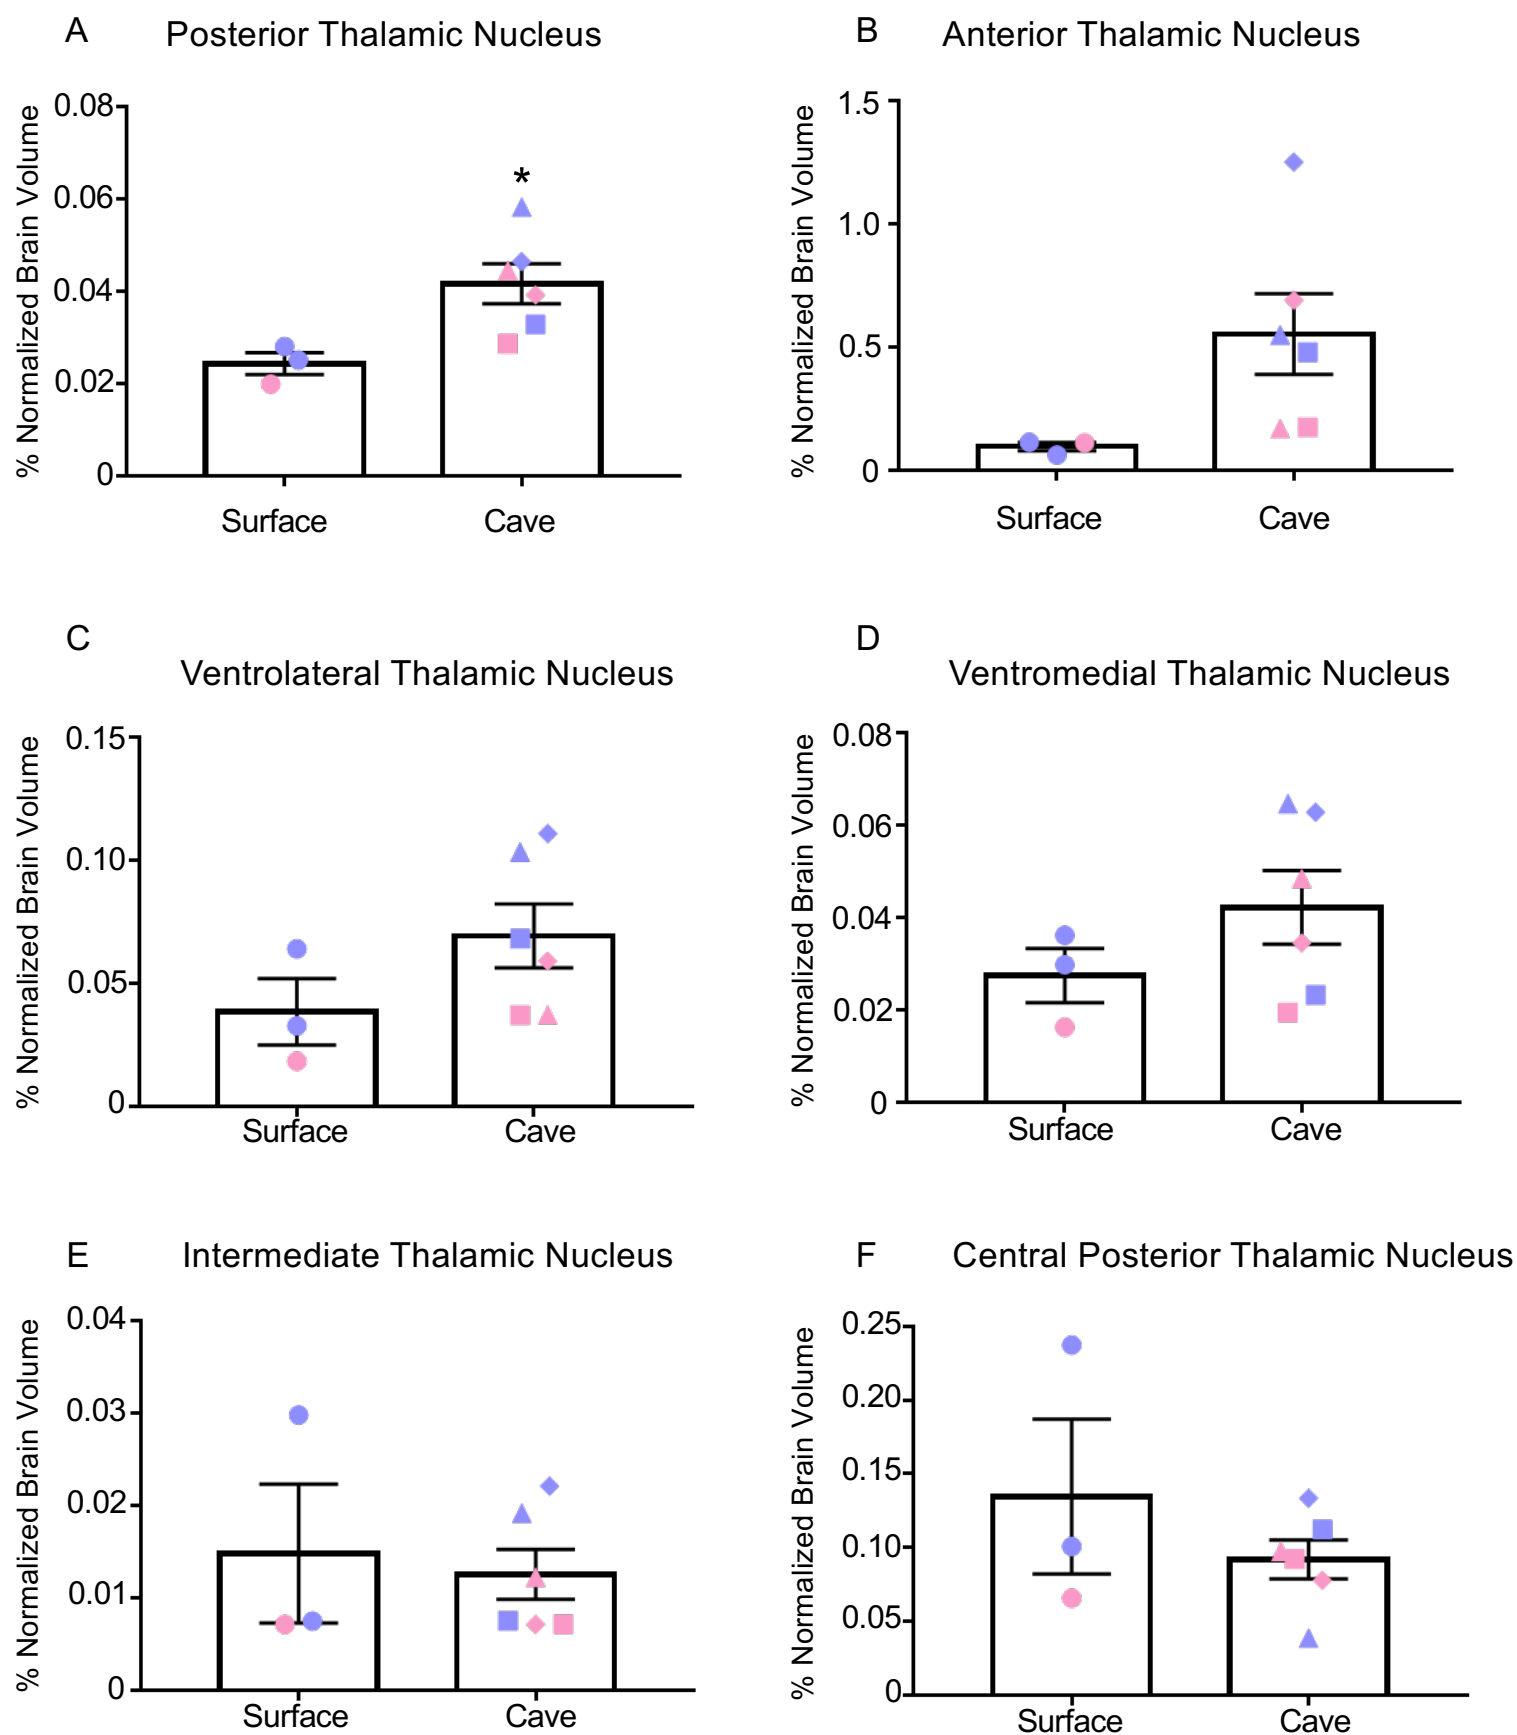

Supplementary Figure 2. Habenula Sub-Nuclei.

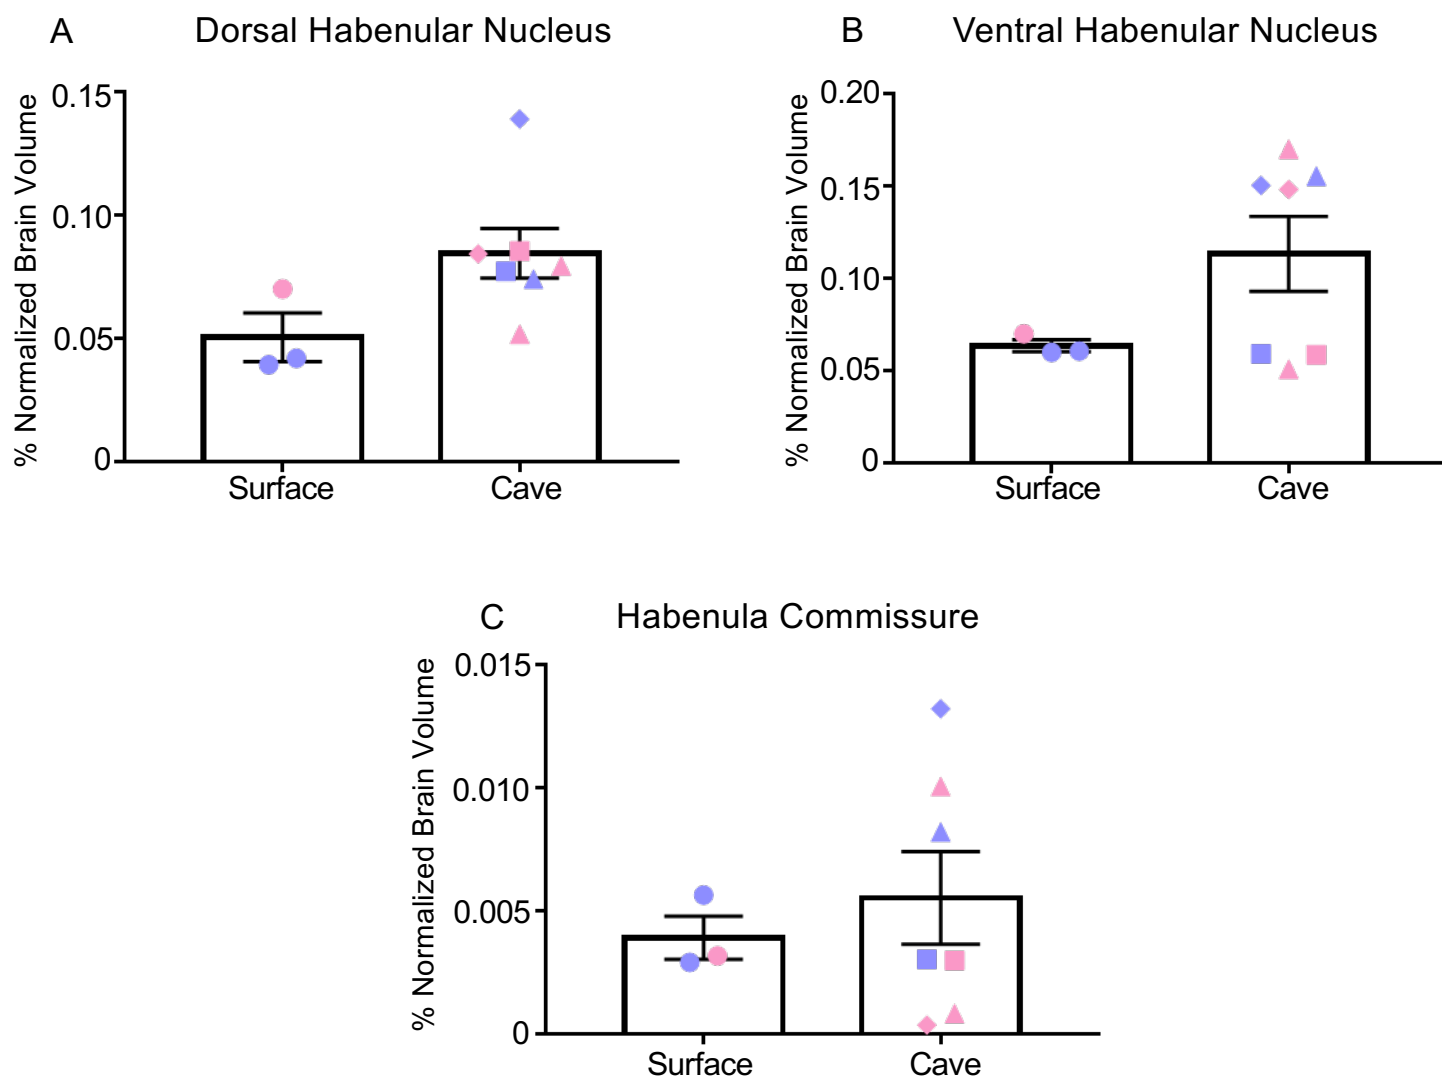

Supplementary Figure 3. Hypothalamus Sub-Nuclei

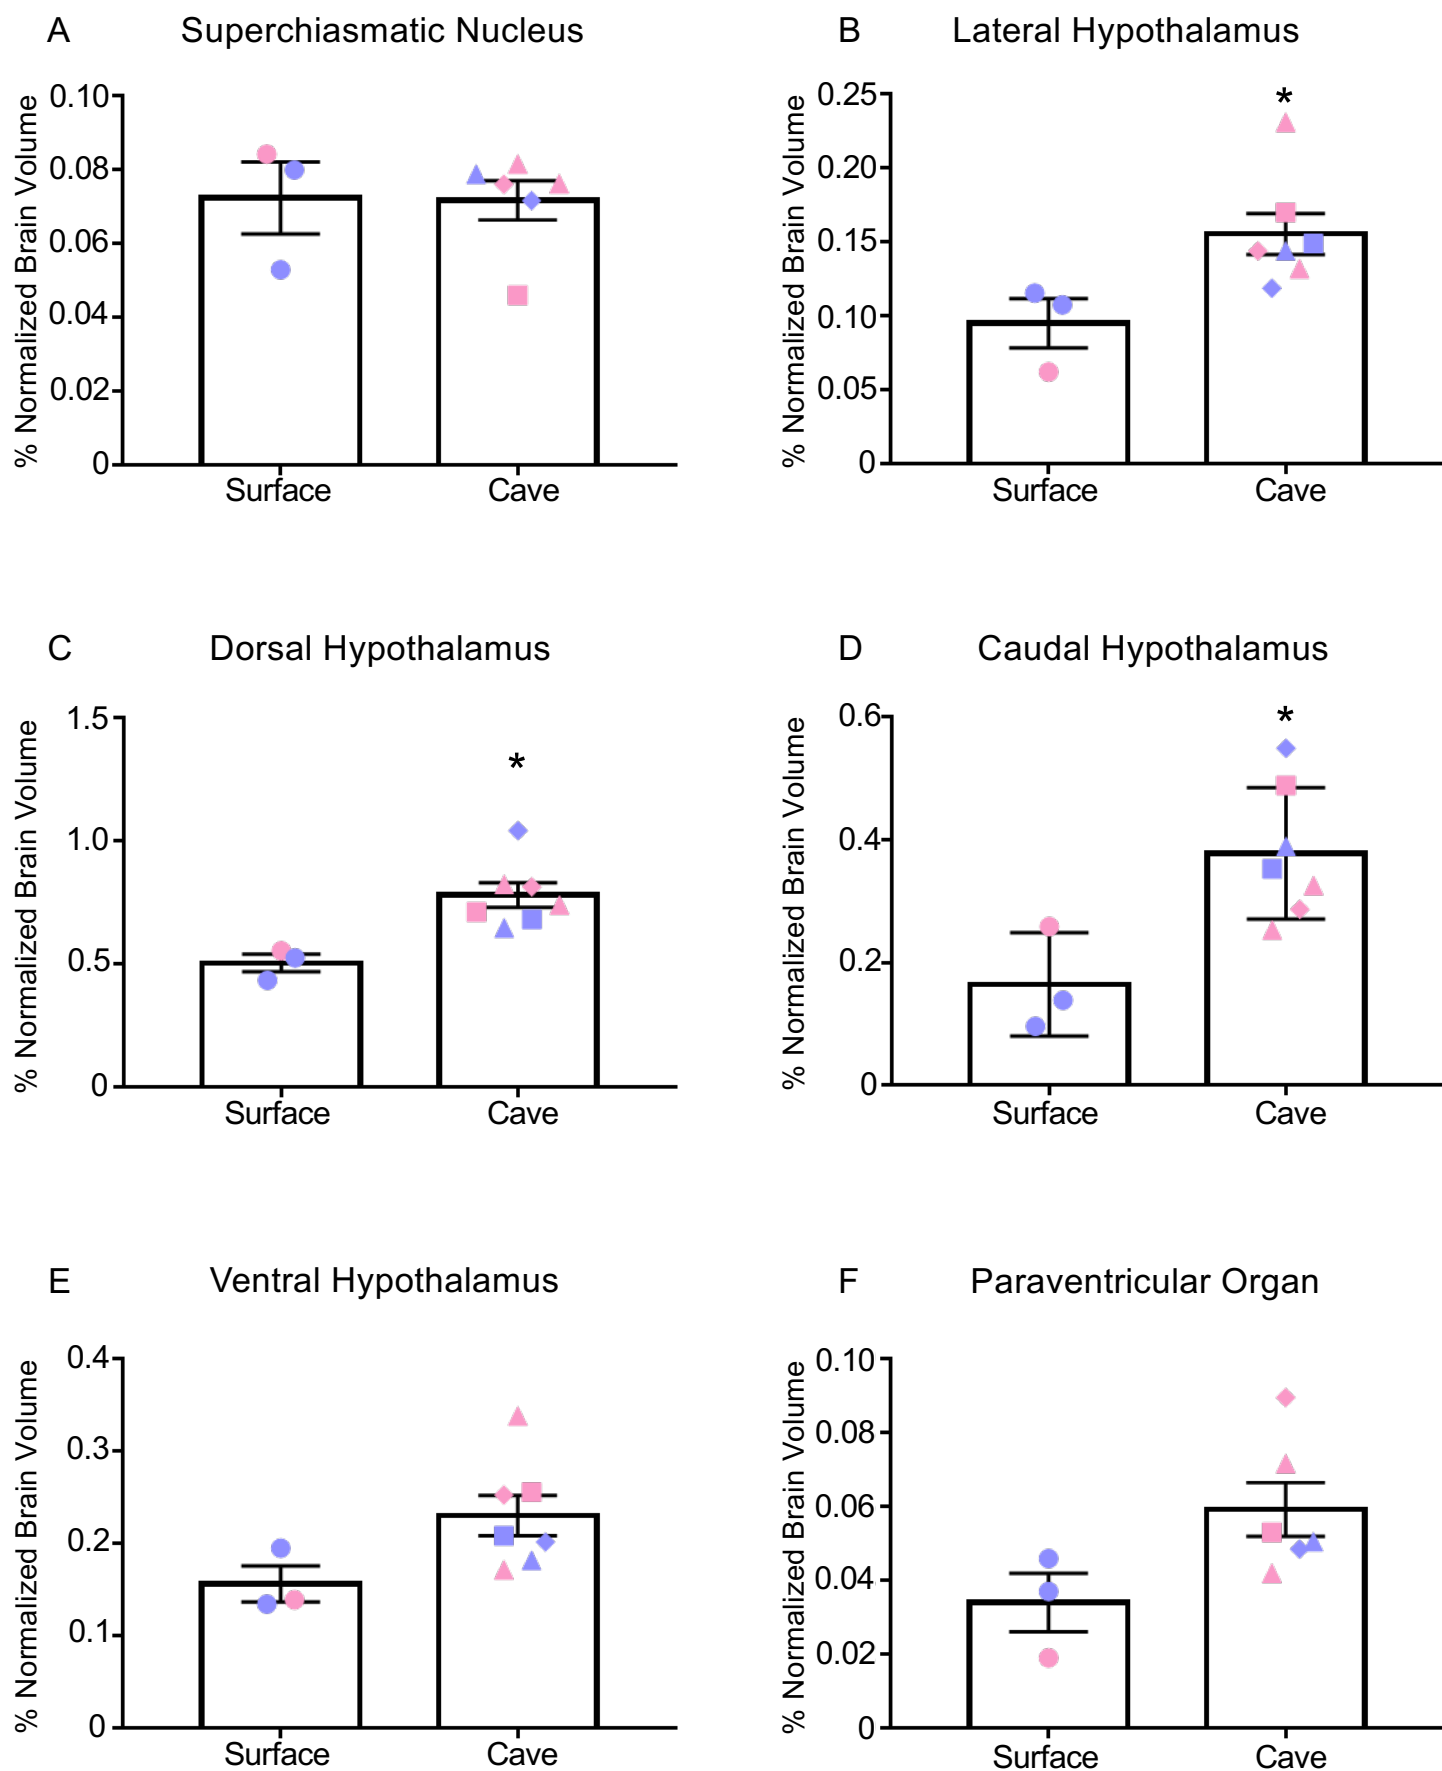

Supplementary Figure 3. Hypothalamus Sub-Nuclei cont.

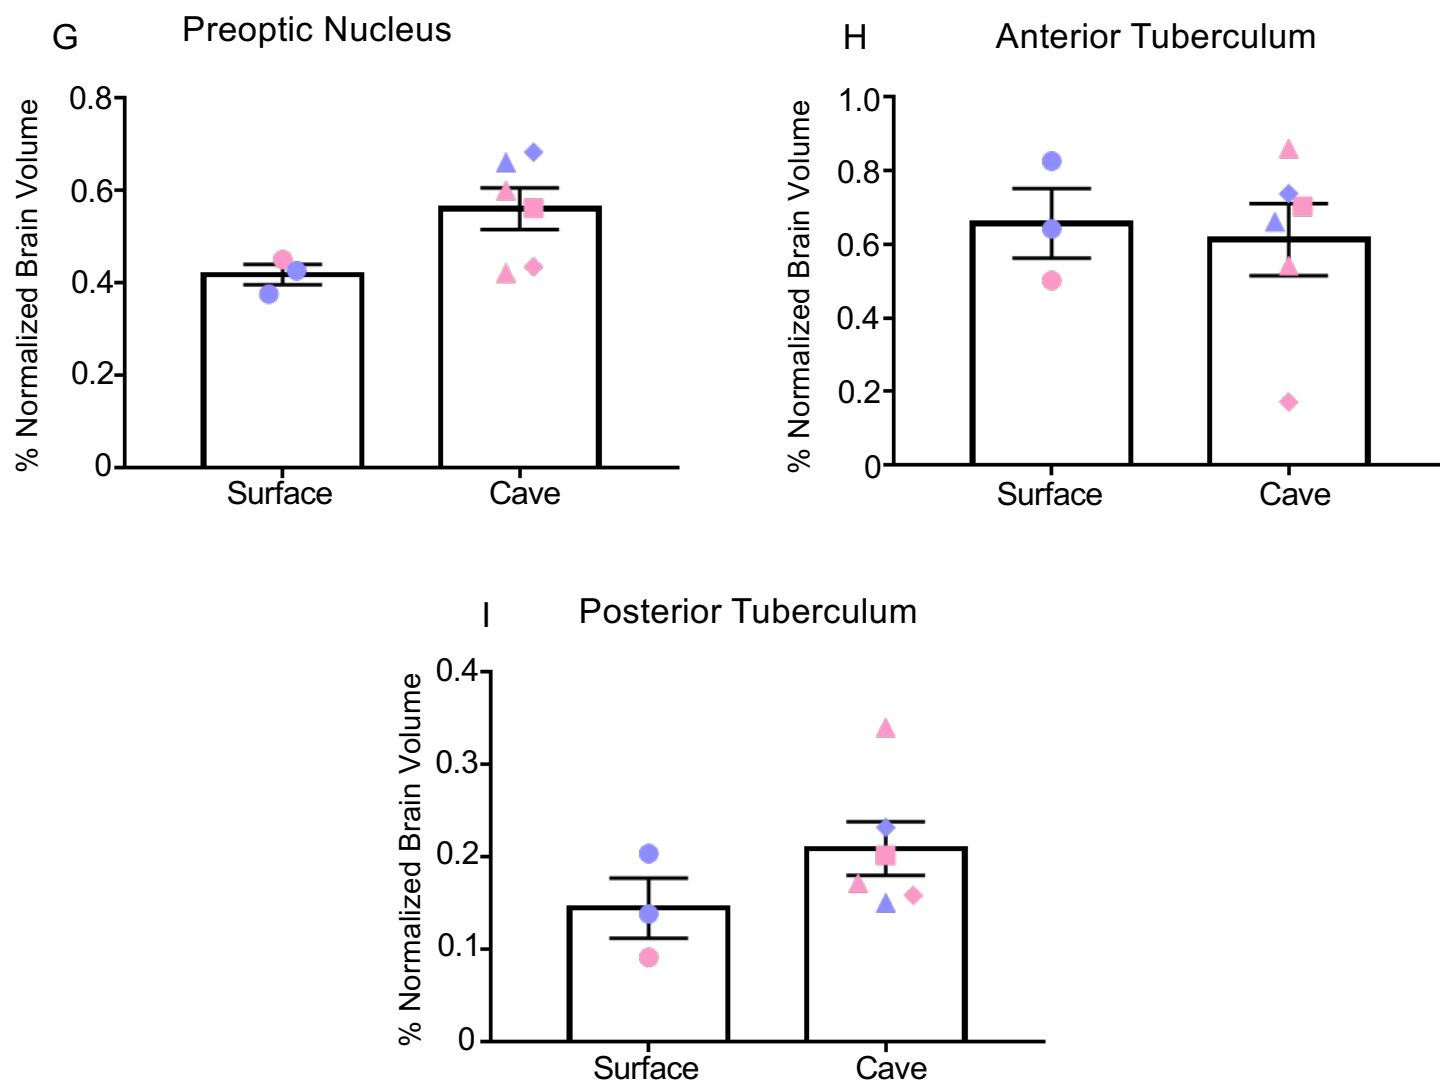

Source: https://www.biorxiv.org/content/10.1101/648188v1.full.pdf
